# Supplementary material for: Biphasic regulation of the transcription factor ABORTED MICROSPORES (AMS) is essential for tapetum and pollen development in Arabidopsis
Source: New Phytol. 2016 Oct 27;213(2):778–90. doi: 10.1111/nph.14200 (PMC5215365; doi:10.1111/nph.14200)
Supplement: Supplementary file 1 — Fig. S1 DAPI staining of anthers to determine staging in PG228_PAMS:AMS‐GR‐YFP in Col background 24 h after DEX addition (Fig. 2). Fig. S2 Characterization of amsms1 double mutant. Fig. S3 Expression of AMS‐YFP and MS1‐YFP. Fig. S4 qRT‐PCR expression of anther transcription factors in different male sterile mutant backgrounds. Fig. S5 Gene expression of AMS targets. Table S1 List of primers used Methods S1 Description of the mathematical model. [file NPH-213-778-s001.pdf]

## Supporting Information Figures

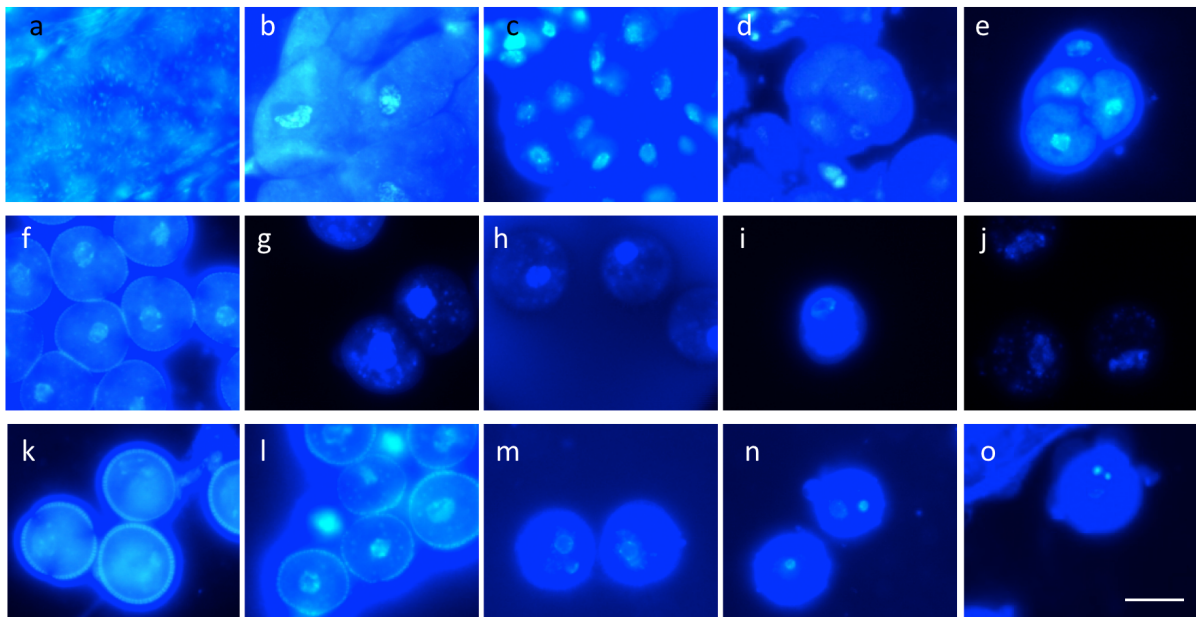

**Figure S1: DAPI staining of *Arabidopsis* anthers to determine staging in PG228\_PAMS:AMS-GR-YFP in Col background 24 hours after DEX addition (Fig 2).** (a) Pollen Mother Cell (PMC) to Pre-Meiosis (Anther stage 5), (b) PMC – Meiosis (Anther stage 6), (c) PMC – Meiosis (Anther stage 6), (d-e) Tetrad (Anther stage 7), (f-h) Single Microspore (Anther stage 8), (i) Polarised Microspore (Anther stage 9), (j-l) Mitosis I (Anther stage 10), (m-n) Bicellular (Anther stage 11), (o) Tricellular (Anther stage 12). Representative image based on three replicates. Scale bar, 20  $\mu$ m.

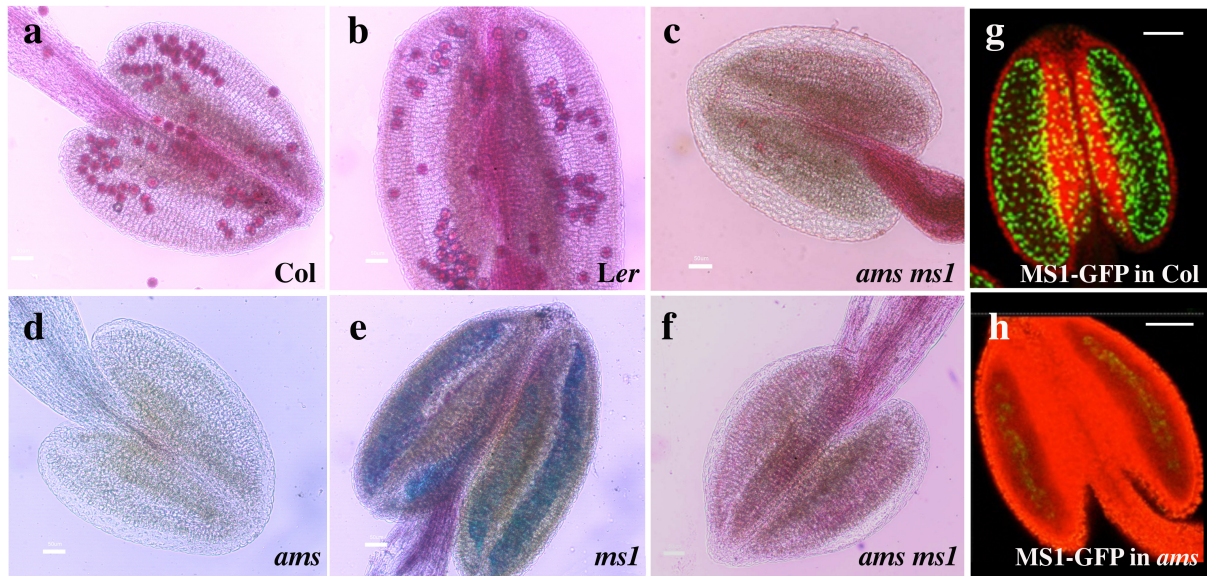

**Figure S2: Characterisation of *Arabidopsis thaliana* *amsms1* double mutant.** (a-f) Alexander staining showing pollen viability in (a) wild type Col, (b) wild type *Ler*, (c) and (f) *ams ms1* double mutant, (d) *ams* (Col background), (e) *ms1* (*Ler* background). The *ams ms1* double mutant exhibited the *ams* phenotype of early microspore degeneration. (g-h) Expression of pMS1::MS1-GFP in (g) wildtype (Col) and (h) *ams* mutant. Scale bar, 50  $\mu$ m

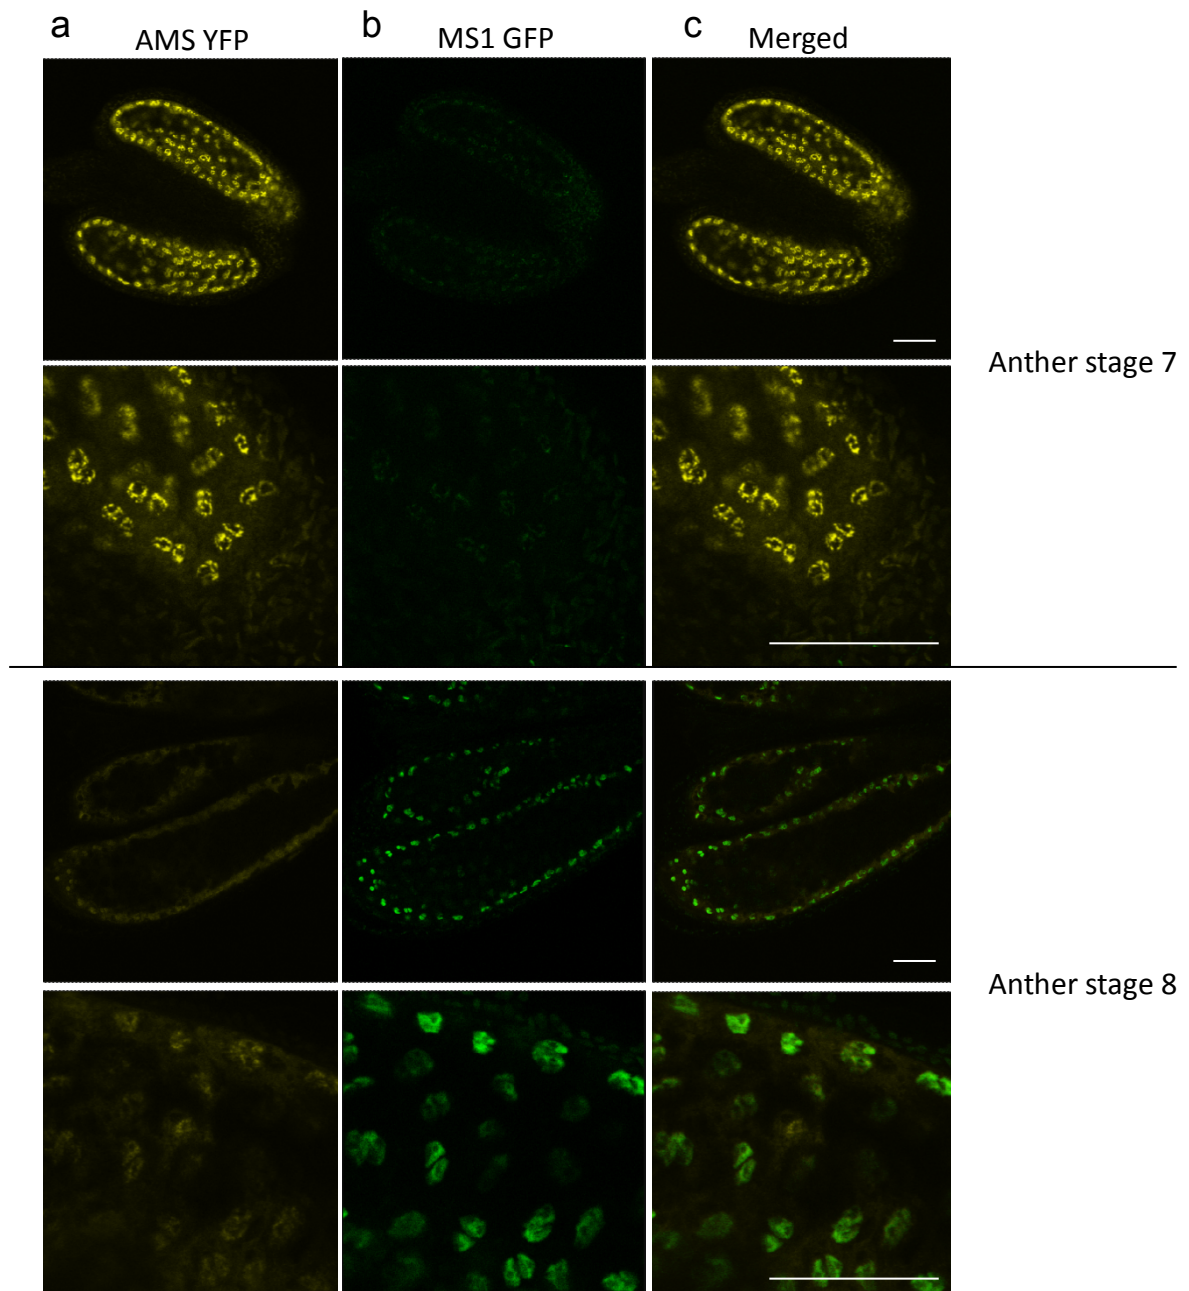

**Figure S3: Expression of AMS-YFP and MS1-YFP in *Arabidopsis* anthers.** (a) AMS-YFP, (b) MS1-GFP, and (c) merged image, in PG228\_PAMS:AMS-GR-YFP crossed with PMS1:MS1-GFP in Col background, 24 hours after DEX treatment at Anther stage 7 and Anther stage 8. Representative image based on at least 8 anthers over 2 separate experiments. Scale bar, 10  $\mu$ m. Extra images to support figure 3.

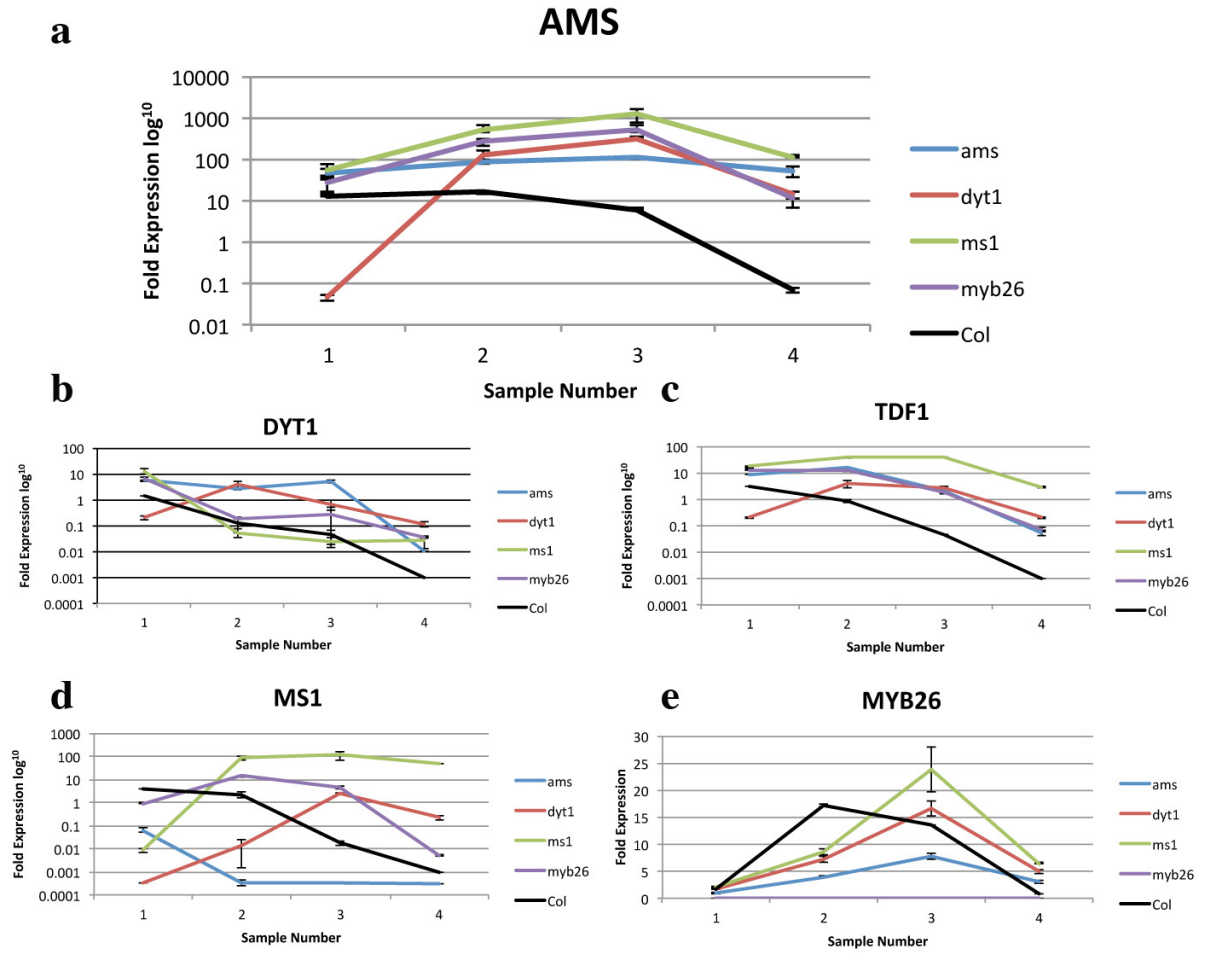

**Figure S4: qRT-PCR expression of anther transcription factors in different *Arabidopsis* male sterile mutant backgrounds.** (a) *AMS*, (b) *DYT1*, (c) *TDF1*, (d) *MS1* and (e) *MYB26* in the different male sterile mutant backgrounds containing PG228\_PAMS:AMS-GR-YFP construct. Sample 1; Anther stages 1-6, 2; Anther stage 7, 3; Anther stage 8-11, 4; Anther stage 12-13. Data are representative of means  $\pm$  SE.

| Gene            | 0hr | 2hr | 4hr | 8hr | 24hr | 48hr | 72hr | 96hr | Direct Targets |
|-----------------|-----|-----|-----|-----|------|------|------|------|----------------|
| TDF1            |     |     |     |     |      |      |      |      | ChIP           |
| TCP TF          |     |     |     |     |      |      |      |      |                |
| CEP1            |     |     |     |     |      |      |      |      |                |
| FUT6            |     |     |     |     |      |      |      |      |                |
| MYB80           |     |     |     |     |      |      |      |      | ChIP           |
| DRL1/TKPR1      |     |     |     |     |      |      |      |      | ChIP           |
| bHLH89          |     |     |     |     |      |      |      |      | Y2H/IP         |
| bHLH91          |     |     |     |     |      |      |      |      | Y2H/IP         |
| bHLH10          |     |     |     |     |      |      |      |      |                |
| ASHR3           |     |     |     |     |      |      |      |      | Y2H            |
| At5g07230       |     |     |     |     |      |      |      |      |                |
| LCR66           |     |     |     |     |      |      |      |      |                |
| MS2             |     |     |     |     |      |      |      |      |                |
| CYP722A1        |     |     |     |     |      |      |      |      |                |
| LTP - At5g07230 |     |     |     |     |      |      |      |      |                |
| LAP5            |     |     |     |     |      |      |      |      | ChIP           |
| CYP703A2        |     |     |     |     |      |      |      |      | ChIP           |
| CYP704B1        |     |     |     |     |      |      |      |      | ChIP           |
| MS1             |     |     |     |     |      |      |      |      |                |
| MYB99           |     |     |     |     |      |      |      |      |                |
| WBC27           |     |     |     |     |      |      |      |      | ChIP           |
| KCS7            |     |     |     |     |      |      |      |      | ChIP           |
| GRP18           |     |     |     |     |      |      |      |      | ChIP           |
| LTP12           |     |     |     |     |      |      |      |      | ChIP           |
| QRT3            |     |     |     |     |      |      |      |      | ChIP           |
| ATA20           |     |     |     |     |      |      |      |      | Y2H/IP         |
| At1g28375       |     |     |     |     |      |      |      |      |                |
| PHT6            |     |     |     |     |      |      |      |      |                |
| CYP86C2         |     |     |     |     |      |      |      |      |                |
| At1g59740       |     |     |     |     |      |      |      |      | ChIP           |
| At3g15900       |     |     |     |     |      |      |      |      |                |
| GRP14           |     |     |     |     |      |      |      |      |                |
| GRP19           |     |     |     |     |      |      |      |      | ChIP           |
| GDSL            |     |     |     |     |      |      |      |      |                |
| XTH3            |     |     |     |     |      |      |      |      |                |
| ANAC025         |     |     |     |     |      |      |      |      |                |
| ATA27           |     |     |     |     |      |      |      |      |                |
| EXL6            |     |     |     |     |      |      |      |      | ChIP+EMSA      |
| GRP20           |     |     |     |     |      |      |      |      |                |
| At3g07820       |     |     |     |     |      |      |      |      |                |
| AGP40           |     |     |     |     |      |      |      |      |                |
| At5g19580       |     |     |     |     |      |      |      |      |                |
| At1g04770       |     |     |     |     |      |      |      |      |                |

**Figure S5: Gene expression of AMS targets.** Expression of AMS targets over a DEX inducible time-course in PG228\_PAMS:AMS-GR-YFP in *ams* background treated daily with DEX. Each gene expression is shown individually normalised to expression at 0hr in PG228\_PAMS:AMS-GR-YFP in *Col* background, and highest expression for that gene is shown as a full bar, the other values are a percentage representative of the highest value. Direct AMS targets are labelled by the experiment (ChIP/EMSA). Black coloured bars represent those genes that are reduced after DEX treatment and grey coloured bars represent those genes that are up-regulated after DEX treatment. Data are representative of means  $\pm$ SE.

## Supporting Tables

Table S1: List of primers used.

| Name              | Reason                               | Sequence (5'..3')                    |
|-------------------|--------------------------------------|--------------------------------------|
| AMSprom-Kpn1_F1   | Cloning of AMS promoter and AMS gene | cccGGTACCGTATGGATATGTGTATTCATGGA TAG |
| AMS_cDNA_AVR11_R1 | Cloning of AMS promoter and AMS gene | ggcctaggTTGGTTGTGGTAATGGTTGATGTGTT G |
| AMS_a_F           | Transgenic Plant genotyping          | GCAGAATGAGGCAAAGGAG                  |
| GFP_PGWB5_R       | Transgenic Plant genotyping          | AAGTCGTGCTGCTTCATGTG                 |
| PG0229 F2         | Transgenic Plant genotyping          | ATTATGCCACACAAGGAGCAC                |
| AMS PRO R4        | Transgenic Plant genotyping          | CTCAGCTCAAATCGCAGCTTGTGTCATTAAC      |
| DBAMS_1F          | Ams SALK insert genotyping           | CACCAatggagagtaatatgcaaaactgttg      |
| DBAMS_7R          | AMS SALK insert genotyping           | TCCTGACTTCTTCTTGTACTTTGGATC          |
| LBb1.3R           | AMS SALK insert genotyping           | ATTTTGCCGATTTCGGAAC                  |
| DBAMS4F           | AMS qRT-PCR                          | CACCaaagatctcaagccaagaacctg          |
| DBAMS3R           | AMS qRT-PCR                          | GTTCTCTTCAAGCTCGTCTTGAAGCTCC         |
| RRT               | MS1 qRT-PCR                          | CAGCCTCAACTCCATTCCTT                 |
| LMRNAsp           | MS1 qRT-PCR                          | CCATTGCCAATATGTTGGTTG                |
| 4g21330_DYT_1F    | DYT1 qRT-PCR                         | ATGGGTGGAGGAAGCAGATTTC               |
| 4g21330_DYT_406R  | DYT1 qRT-PCR                         | CCCCAATCTTACACAATTGCACA              |
| TDF1_F            | TDF1 qRT-PCR                         | CGGACCCGGTTCCTCAAGTA                 |
| TDF1_R            | TDF1 qRT-PCR                         | ACGAAGGAACTCGCGGAATG                 |
| At3g13220_624F    | WBC27 qRT-PCR                        | CAAAGAGCTCGGCCTCGAAA                 |
| At3g13220_934R    | WBC27 qRT-PCR                        | TGCCGTAAAAGGCAGGGTGT                 |
| CYP703A2 885F     | CYP703A2 qRT-PCR                     | TGAGAACGGGAAGGCACACA                 |
| CYP703A2 1188R    | CYP703A2 qRT-PCR                     | ACGTGTCTTTGCCGGGATGT                 |
| PP2A3 1255F       | PP2A qRT-PCR                         | TCCGTGAAGCTGCTGCAAAC                 |

|               |                |                             |
|---------------|----------------|-----------------------------|
| PP2A3_1677R   | PP2A qRT-PCR   | CACCAAGCATGGCCGTATCA        |
| LTP12_53F     | LTP12 qRT-PCR  | TGGCATCCCCAACAGAGTCA        |
| LTP12_315R    | LTP12 qRT-PCR  | GGGGTAGGGAATTGAAACACCA      |
| MYB103_437F   | MYB103 qRT-PCR | TCGAGGCCTCTACCACCACAA       |
| MYB103_177R   | MYB103 qRT-PCR | TGAAACGGCTCTTGCTGACG        |
| EXL6_562F     | EXL6 qRT-PCR   | TGTCGCTCCCGCTCTTCTTC        |
| EXL6_742R     | EXL6 qRT-PCR   | TCCGAATACCCACCGAATG         |
| QRT3_F        | QRT3 qRT-PCR   | 5'-CGGACAAGCATAGACAAC-3'    |
| QRT3_R        | QRT3 qRT-PCR   | 5'-CGGTTATGTGTTGACCAA-3'    |
| KCS7_339F     | KCS7 qRT-PCR   | GTGCCTGCGACAGTCCATGA        |
| KCS7_587R     | KCS7 qRT-PCR   | GCAGCCCATAACCGCTCAAAC       |
| A6_F          | A6 qRT-PCR     | 5'-TCCACCGTGTATTCAATC-3'    |
| A6_R          | A6 qRT-PCR     | 5'-GATCCTCACAATGCCTTA-3'    |
| GRP18RTF      | GRP18 qRT-PCR  | TTCCACCCCCTGGTTTATTT        |
| At5g07520R    | GRP18 qRT-PCR  | GATGGCCGTTGCTCTCAT          |
| bHLH10_957F   | bHLH10 qRT-PCR | TGGTGAAGGAGGAGGAGGAGAA      |
| bHLH10_1246R  | bHLH10 qRT-PCR | CACCAATCTGTCCACCTGCAAC      |
| 1g06170_929F  | bHLH89 qRT-PCR | 5'-CCTTGAGATGCTCATGGCTCA-3' |
| 1g06170_1118R | bHLH89 qRT-PCR | 5'-TGGTGCTCTCCGATTTGTGC-3'  |
| 2g31210_927F  | bHLH91 qRT-PCR | 5'-GAAGAAGCCGGAGAGCGATG-3'  |
| 2g31210_1144R | bHLH91 qRT-PCR | 5'-CTCCGGCAACATGGTGAAGA-3'  |
| R1451         | MYB26 qRT-PCR  | TTGGGAACATCAATGGGGTCAT      |
| RT345         | MYB26 qRT-PCR  | GCTCATGTCTCACCATCATCACG     |
| NST1_66F      | NST1 qRT-PCR   | TCATCCGACCGAGGAAGAGC        |
| NST1_1392R    | NST1 qRT-PCR   | GAAGCTCCTCCGACGGGACT        |
| NST2_F        | NST2 qRT-PCR   | CCAAGTCAACAACCTGCCACG       |
| NST2_R        | NST2 qRT-PCR   | GTCGTTCTCGCGAAATCTGC        |
| MYB99_122F    | MYB99 qRT-PCR  | GAGGATGGTGCTGGAGAGAC        |
| MYB99_444R    | MYB99 qRT-PCR  | GCTTTGGATCGTTGACCAAT        |
| YFP_NY-F      | YFP qRT-PCR    | AGCAAGGGCGAGGAGCTGTTC       |
| GFP_PGWB5_R   | YFP qRT-PCR    | AAGTCGTGCTGCTTCATGTG        |

|               |                   |                       |
|---------------|-------------------|-----------------------|
| LAP6_390F     | LAP6 qRT-PCR      | ATTGCAAACGAGGCGGTTGT  |
| LAP6_617R     | LAP6 qRT-PCR      | ACGGAGGCCAGTCACACCTC  |
| ATA20_682_F   | ATA20 qRT-PCR     | TGGTGTGGCTATGGCGTTG   |
| ATA20_943_R   | ATA20 qRT-PCR     | ACCTGGAGCTCCCGTGACAG  |
| ATBCB_205_F   | AtBCB qRT-PCR     | CTGCTGGGAGGCATGATGTG  |
| ATBCB_459_R   | AtBCB qRT-PCR     | TTGGGGTTGATCCAGGTGCT  |
| Lip3_485F     | At5g24210 qRT-PCR | TGCGTTACGGGGAAGTGTCC  |
| Lip3_668R     | At5g24210 qRT-PCR | TGCCAGGCCAGCTCCTAAAG  |
| 1g28375_88_F  | At1g28375 qRT-PCR | TCGACCGTAATGGCAAGACC  |
| 1g28375_257_R | At1g28375 qRT-PCR | ACTGGCCCGGGATAAGGAAA  |
| CYP81_718F    | CYP81F2 qRT-PCR   | GTGCGAGCCATCCAGGAGAT  |
| CYP81_996R    | CYP81F2 qRT-PCR   | CCATCGCCCATTCCAATGTT  |
| PHT6_231F     | PHT6 qRT-PCR      | GGCCTTCGCTGGAACGTTTA  |
| PHT6_529R     | PHT6 qRT-PCR      | TCCCAATCCCTTGCATACCG  |
| CYP86C2_709F  | CYP86C2 qRT-PCR   | CCGCCTTTTGTGTGGAAACC  |
| CYP86C2_1002R | CYP86C2 qRT-PCR   | AGTAAGCGCGACGGAACCTCG |
| 1g59740_511F  | At1g59740 qRT-PCR | TTCGGCTTCGTCGAGCTTTC  |
| 1g59740_800R  | At1g59740 qRT-PCR | TCGCCCATTGAGAATGCAAA  |
| LCR66_137F    | LCR66 qRT-PCR     | TGGGTCTGGTCACGGTAGAGG |
| LCR66_291R    | LCR66 qRT-PCR     | GGTGCACAAACAGCGACGAC  |
| 3g07820_196F  | At3g07820 qRT-PCR | ACGGAGGAGGAGCCTTCGAC  |
| 3g07820_621R  | At3g07820 qRT-PCR | CTGTCTTCTGGGGCGACGAT  |
| 3g15900_244F  | At3g15900 qRT-PCR | GGAGTTCCCACGCTTTCTCG  |
| 3g15900_413R  | At3g15900 qRT-PCR | GCTTGTTCCGACCGGTCATC  |
| CYP89A6_1073F | CYP89A6 qRT-PCR   | ACGCGCAAAAGATGCCGTAT  |
| CYP89A6_1268R | CYP89A6 qRT-PCR   | GCCATTGGTTCCTCCCACAC  |
| CBF1_378F     | CBF1 qRT-PCR      | TTTGGCTCGGGACTTTCCAA  |
| CBF1_659R     | CBF1 qRT-PCR      | ACGCACCTTCGCTCTGTTC   |
| XTH3_90F      | XTH3 qRT-PCR      | TTTCGGAGGACGAGGAATCG  |
| XTH3_247R     | XTH3 qRT-PCR      | CGTAGGCGTCCTTGGATTCTG |
| LTP_119F      | At5g07230 qRT-PCR | CCCAGCAGTGCAGAGACGAA  |

|               |                   |                         |
|---------------|-------------------|-------------------------|
| LTP_274R      | At5g07230 qRT-PCR | GTGTGGTGGCTGCTCGAAGA    |
| 3g20865_92F   | AGP40 qRT-PCR     | TCTTTGTGGCCCTCTTTATCTCG |
| 3g20865_248R  | AGP40 qRT-PCR     | GCCAAGAAGGCGGAGAGTGA    |
| ATA27_731F    | ATA27 qRT-PCR     | TGTGTCACGATGGACGGTCA    |
| ATA27_1016R   | ATA27 qRT-PCR     | GGCAGTCGATGTCCGATGTG    |
| 5g19580_202F  | At5g19580 qRT-PCR | CCTCCCTGGGTTCAACAACG    |
| 5g19580_387R  | At5g19580 qRT-PCR | GCATGCATCCCTGACACACC    |
| TDF1_ChIP_F1  | TDF1 ChIP + EMSA  | TGTGGTTAGACAAAGTAGCAGC  |
| TDF1_ChIP_R1  | TDF1 ChIP + EMSA  | TCACCATTCTCTGATCCGCA    |
| DYT1_ChIP_F1  | DYT1 ChIP + EMSA  | GAACCAATCTTTGCGGAGGG    |
| DYT1_ChIP_R1  | DYT1 ChIP + EMSA  | GGAGACGAGCATTTTGTGGG    |
| MYB80_ChIP_F2 | MYB80 ChIP        | CGGCTTAAGGGAATCACACG    |
| MYB80_ChIP_R2 | MYB80 ChIP        | CAAAGATTGCCCCACCCAAA    |

## Supporting Files

**Method S1: Description of the mathematical model.**

**Table S2: Expression analysis and protein intensity data of genes used for modelling; original construction of the mathematical model and the data used to test the model.**

**Table S3: Re-analysis of the microarray data of Xu et al. (2010), showing genes which were differentially regulated at each stage.**

**Xu, J., Yang, C., Yuan, Z., Zhang, D., Gondwe, M.Y., Ding, Z., Liang, W., Zhang, D., and Wilson, Z.A. (2010). The ABORTED MICROSPORES Regulatory Network Is Required for Postmeiotic Male Reproductive Development in *Arabidopsis thaliana*. *Plant Cell* **22**, 91-107.**

# Biphasic regulation of the transcription factor ABORTED MICROSPORES (AMS) is essential for tapetal and pollen development in Arabidopsis.

## Methods S1: Description of the Mathematical Model

In this supplementary text, we describe the development and analysis of a set of mathematical models of the AMS genetic regulatory network in the tapetum. The model describes the dynamics of the five network components (DYT1, TDF1, AMS, MYB80, MS1), which are involved in regulating many of the genes in the anther, including those responsible for pollen development and release. The model investigates the dynamics of these components during nine anther samples, corresponding to anther stages 5-12, and determines how the network dynamics create the two peaks of AMS that control tapetal development.

### 1 Model I

#### 1.1 Model description

The initial model describes the transcription factor cascade of DYT1, TDF1, AMS, MYB80 and MS1 in that order, and consider both the mRNA and protein levels. The RT-qPCR data shows a peak of DYT1 expression at samples 2-3, suggesting that DYT1 transcription is regulated by upstream factors such as SPL/NZZ or EXS/EMS1; modelling these upstream components is beyond the scope of the current model, and therefore we prescribe the DYT1 transcription rate to be given by an exponential function of time:

$$\alpha_{mD}(t) = a_{mD} \exp\left(-\left(\frac{t-b_D}{c_D}\right)^2\right),$$

where  $a_{mD}$ ,  $b_D$ ,  $c_D$ , are unknown parameters. As well as the direct cascade, we assume that MS1 negatively inhibits TDF1, AMS and MS1 transcription, and assume that AMS negatively inhibits TDF1 transcription, as described in the main text.

Additionally, we make the assumption that MS1 protein increases the rate at which AMS protein is degraded, which we take to be a direct interaction even though it is likely to be through an intermediate gene. An assumption such as this is required in order to decouple the protein and transcript behaviours for AMS, as is seen in the experimental data. These interactions may be seen in the network diagram given in Figure 4 of the main text. We take a deterministic approach, with the network dynamics describes by a coupled system of ordinary differential equations (ODEs). Using Hill functions to represent the transcriptional regulations, the complete system is given by

$$\begin{aligned} ([mDYT1])' &= \alpha_{mD}(t) - \mu_{mD}[mDYT1], \\ ([mTDF1])' &= \alpha_{mT} \frac{[pDYT1]}{K_T + [pDYT1] + [pMS1]\zeta_{TM} + [pAMS]\zeta_{TA}} - \mu_{mT}[mTDF1], \end{aligned}$$

$$\begin{aligned}
([\text{mAMS}]') &= \alpha_{mA} \frac{[\text{pTDF1}]}{K_A + [\text{pTDF1}] + [\text{pMS1}] \zeta_{AM}} - \mu_A [\text{mAMS}], \\
([\text{mMYB80}]') &= \alpha_{mY} \frac{[\text{pAMS}]}{K_Y + [\text{pAMS}]} - \mu_Y [\text{mMYB80}], \\
([\text{mMS1}]') &= \alpha_{mM} \frac{[\text{pMYB80}]}{K_M + [\text{pMYB80}] + [\text{pMS1}] \zeta_{MM}} - \mu_M [\text{mMS1}], \\
([\text{pDYT1}]') &= \alpha_{pD} [\text{mDYT1}] - \mu_{pD} [\text{pDYT1}], \\
([\text{pTDF1}]') &= \alpha_{pT} [\text{mTDF1}] - \mu_{pT} [\text{pTDF1}], \\
([\text{pAMS}]') &= \alpha_{pA} [\text{mAMS}] - \mu_{pA} [\text{pAMS}] \left( 1 + \frac{\zeta_{pA} [\text{pMS1}]}{K_{pA} + [\text{pMS1}]} \right), \\
([\text{pMYB80}]') &= \alpha_{pY} [\text{mMYB80}] - \mu_{pY} [\text{pMYB80}], \\
([\text{pMS1}]') &= \alpha_{pM} [\text{mMS1}] - \mu_{pM} [\text{pMS1}],
\end{aligned}$$

where  $\alpha_{mi}$  are the maximum transcription rates,  $\alpha_{pi}$  are the translation rates, and  $\mu_{mi}$  and  $\mu_{pi}$  are the mRNA and protein degradation rates respectively, for species  $i$ . In the Hill functions, parameters  $K_i$  are the half-saturation constants and  $\zeta_{ij}$  is a parameter expressing the negative regulation of species  $i$  by species  $j$ . Throughout a subscript  $Y$  represents MYB80, otherwise the first letter of the gene name is used.

## 1.2 Parameter estimation

The model dynamics depend on 32 parameter values which are not available in the current literature; we therefore fit these parameter values using the experimental data presented in the main text. The predicted mRNA levels were fitted to a RT-qPCR DEX-inducible time-course of buds, using staged material from *Col-0* (see Table S2). The data give the mRNA levels at 9 samples during anther development; these samples are assumed to be approximately evenly spaced in time and we therefore use them as a proxy for time in the governing equations. Additionally, the AMS and MS1 protein levels were fitted to the mean values of the protein levels obtained from confocal images of DEX-inducible AMSpro::AMS-GR-YFP  $\times$  MS1pro::MS1-GFP lines and measured using the IMARIS software, averaged across tapetal cells (see Figure 2 of the main text, and Table S2), at equivalent timepoints as the RT-qPCR data. The other protein levels were unavailable and hence not included in the fits. In order to fit the parameters to these two sets of data, we use the MATLAB genetic algorithm (ga) to find the parameter set which minimizes the weighted squared distance between the model predictions and experimental data; thus, we set the algorithm to minimise the following objective function,

$$f = \sum_{t=1}^9 \left[ \frac{2 \left( [\text{pAMS}](t) - \overline{[\text{pAMS}]}(t) \right)^2}{\max_t([\text{pAMS}])} + \frac{2 \left( [\text{pMS1}](t) - \overline{[\text{pMS1}]}(t) \right)^2}{\max_t([\text{pMS1}])} + \sum_X \frac{(\text{mX}(t) - \overline{\text{mX}}(t))^2}{\max_t(\overline{\text{mX}})} \right], \quad (1)$$

where  $X$  is the set of transcription factors under consideration (DYT1, TDF1, AMS, MYB80, MS1, and in later models bHLH89/91) and barred quantities are the experimental data. Given our focus on the AMS protein dynamics, the objective function includes a two-fold weighting on the protein data compared to the mRNA data. All the parameters in the model were varied on a logarithmic scale and taken to be in the range  $10^{-6}$  and  $10^6$ . Preliminary fits were obtained using objective functions with (i) no weighting, (ii) weighting using the variance of each data measurement, and (iii) weighting using the maximum value in data set; we obtained the best fits using the maximum (option iii), as described in equation 1). The best fit found by 30 runs of the genetic algorithm had an objective function value of  $f^* = 1.6734$ , with the parameter values given in Table I.

The resulting plots are shown in Figure I; the model predictions and data are not in good agreement and the model does not reproduce the second peak in the AMS protein data.

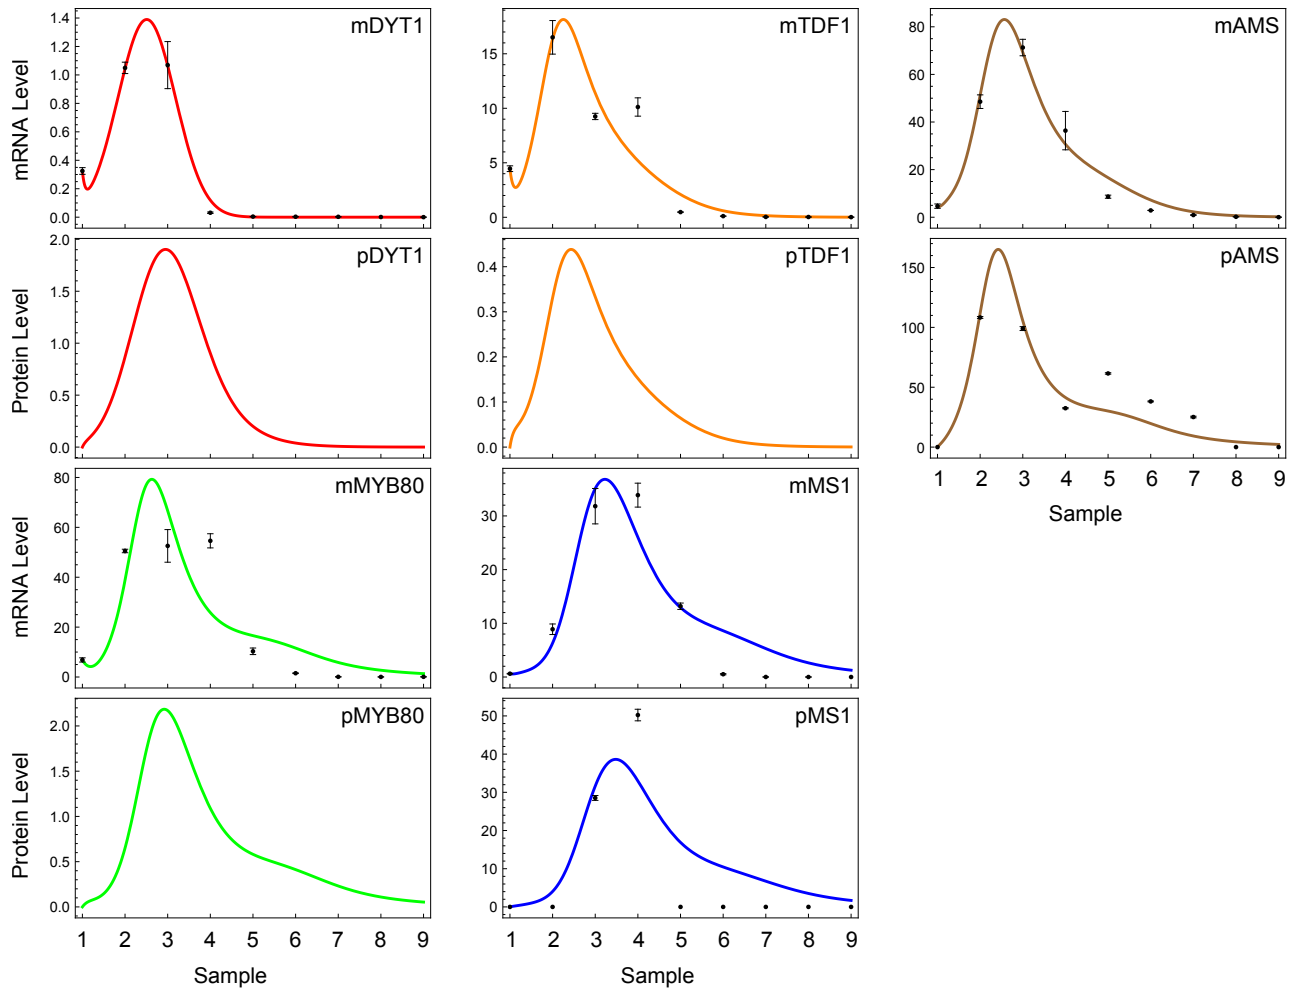

Figure I: Predicted (lines) and measured (dots with standard error bars) protein and mRNA levels for Model I, using the model parameter values given in Table I.

## 2 Model II

In order to improve the fit to the data, we added an additional transcription factor which works with DYT1 and AMS to regulate their targets; this is hypothesised to be another bHLH transcription factor such as bHLH89 or bHLH91, as they are known to bind to DYT1 (Feng et al., 2012) and AMS (Xu et al., 2010). In the same way as for DYT1, we assume this additional bHLH(s) is also regulated by some unknown upstream genes and so assume the rate of bHLH transcription to be given by

$$\alpha_{mB}(t) = a_{mB} \exp\left(-\left(\frac{t-b_B}{c_B}\right)^2\right), \quad (2)$$

introducing three further unknown parameters  $a_{mB}$ ,  $b_B$ ,  $c_B$ . The set of differential equations for the system is therefore given by:

$$\begin{aligned} ([mDYT1])' &= \alpha_{mD}(t) - \mu_{mD}[mDYT1], \\ ([mbHLH])' &= \alpha_{mB}(t) - \mu_{mB}[mbHLH], \\ ([mTDF1])' &= \alpha_{mT} \frac{[pDYT1][pbHLH]}{K_T + [pDYT1][pbHLH] + [pMS1]\zeta_{TM} + [pAMS]\zeta_{TA}} - \mu_{mT}[mTDF1], \\ ([mAMS])' &= \alpha_{mA} \frac{[pTDF1]}{K_A + [pTDF1] + [pMS1]\zeta_{AM}} - \mu_A[mAMS], \\ ([mMYB80])' &= \alpha_{mY} \frac{[pAMS][pbHLH]}{K_Y + [pAMS][pbHLH]} - \mu_Y[mMYB80], \\ ([mMS1])' &= \alpha_{mM} \frac{[pMYB80]}{K_M + [pMYB80] + [pMS1]\zeta_{MM}} - \mu_M[mMS1], \\ ([pDYT1])' &= \alpha_{pD}[mDYT1] - \mu_{pD}[pDYT1], \\ ([pbHLH])' &= \alpha_{pB}[mbHLH] - \mu_{pB}[pbHLH], \\ ([pTDF1])' &= \alpha_{pT}[mTDF1] - \mu_{pT}[pTDF1], \\ ([pAMS])' &= \alpha_{pA}[mAMS] - \mu_{pA}[pAMS] \left(1 + \frac{\zeta_{pA}[pMS1]}{K_{pA} + [pMS1]}\right), \\ ([pMYB80])' &= \alpha_{pY}[mMYB80] - \mu_{pY}[pMYB80], \\ ([pMS1])' &= \alpha_{pM}[mMS1] - \mu_{pM}[pMS1]. \end{aligned}$$

This model is fitted to the mRNA and protein levels as described for the previous Model I. As bHLH89 and bHLH91 have very similar expression patterns and protein structure and have previously been shown to act redundantly, we assumed they may be acting redundantly and so the transcript levels of the additional bHLH were also fit to the sum of the measured levels of bHLH89 and bHLH91 mRNA; this the difference between predicted and measured bHLH mRNA levels was included as an additional term in the objective function. We note that other transcription factors, such as bHLH10, could also contribute to the modelled bHLH levels, though have not been included here. The best fit has an objective function value of  $f^* = 1.3869$ , with the parameter values given in Table I and model dynamics shown in Figure II. This model does include the second peak in the AMS protein, and is a much better fit than Model II.

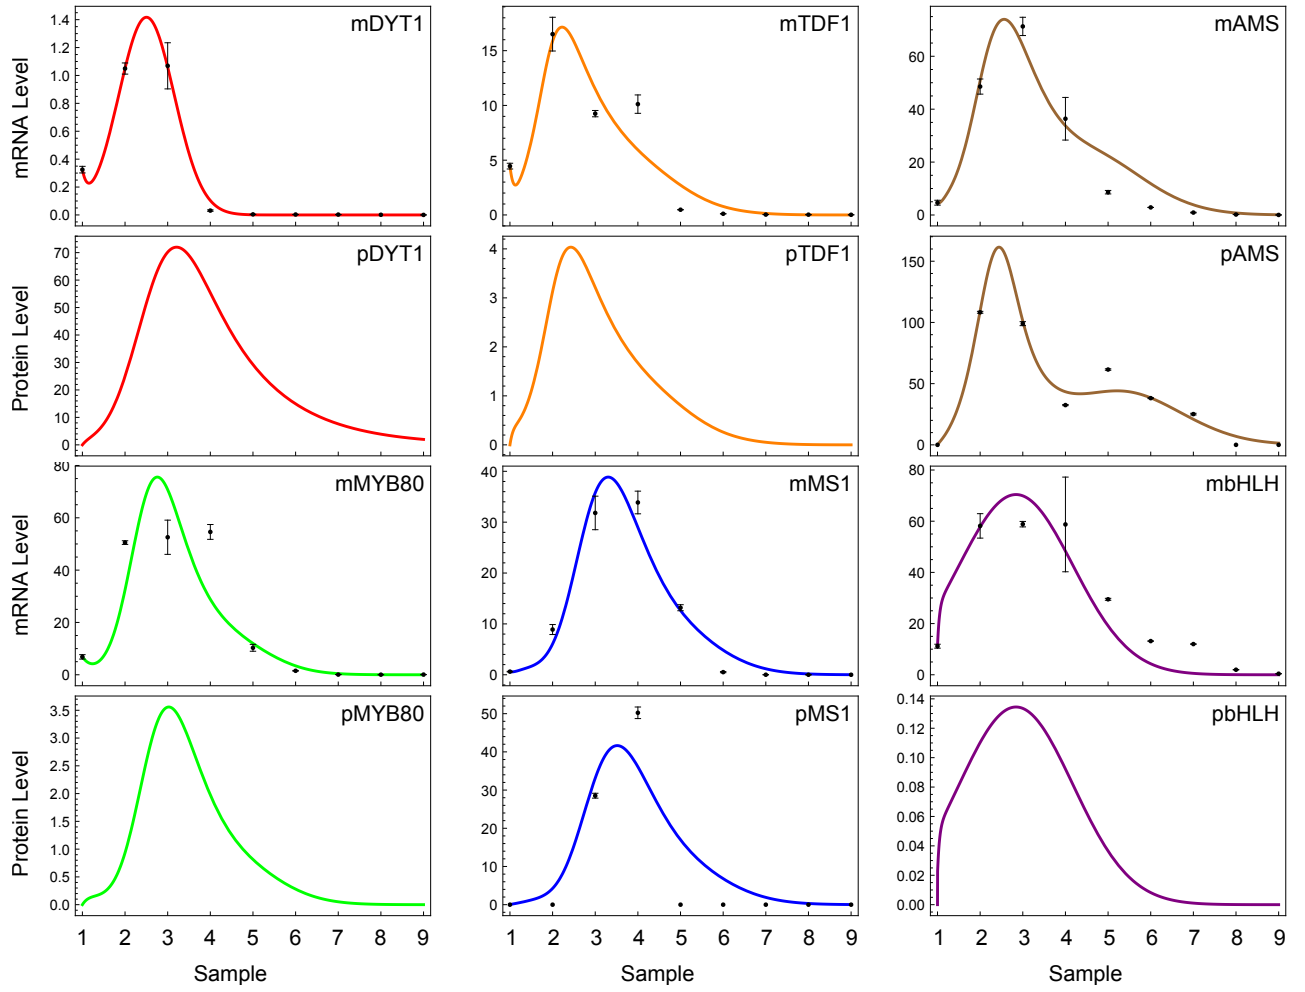

Figure II: Predicted (lines) and measured (dots with standard error bars) protein and mRNA levels for Model II, using the model parameter values given in Table I.

### 3 Model III

To further improve the model fit, we now assume that the additional bHLH forms protein complexes with DYT1 and AMS to promote the regulation of TDF1 and MYB80 respectively. The final set of equations is therefore given by,

$$\begin{aligned}
([mDYT1])' &= \alpha_{mD}(t) - \mu_{mD}[mDYT1], \\
([mbHLH])' &= \alpha_{mB}(t) - \mu_{mB}[mbHLH], \\
([mTDF1])' &= \alpha_{mT} \frac{[DYT1:bHLH]}{K_T + [DYT1:bHLH] + [pMS1]\zeta_{TM} + [pAMS]\zeta_{TA}} - \mu_{mT}[mTDF1], \\
([mAMS])' &= \alpha_{mA} \frac{[pTDF1]}{K_A + [pTDF1] + [pMS1]\zeta_{AM}} - \mu_A[mAMS], \\
([mMYB80])' &= \alpha_{mY} \frac{[AMS:bHLH]}{K_Y + [AMS:bHLH]} - \mu_Y[mMYB80], \\
([mMS1])' &= \alpha_{mM} \frac{[pMYB80]}{K_M + [pMYB80] + [pMS1]\zeta_{MM}} - \mu_M[mMS1], \\
([pDYT1])' &= \alpha_{pD}[mDYT1] - \mu_{pD}[pDYT1] - \alpha_{DB}[pDYT1][pbHLH] + \mu_{DB}[DYT1:bHLH], \\
([pbHLH])' &= \alpha_{pB}[mbHLH] - \mu_{pB}[pbHLH] - \alpha_{AB}[pAMS][pbHLH] + \mu_{AB}[AMS:bHLH] \\
&\quad - \alpha_{DB}[pDYT1][pbHLH] + \mu_{DB}[DYT1:bHLH], \\
([pTDF1])' &= \alpha_{pT}[mTDF1] - \mu_{pT}[pTDF1], \\
([pAMS])' &= \alpha_{pA}[mAMS] - \mu_{pA}[pAMS] \left( 1 + \frac{\zeta_{pA}[pMS1]}{K_{pA} + [pMS1]} \right) \\
&\quad - \alpha_{AB}[pbHLH][pAMS] + \mu_{AB}[AMS:bHLH], \\
([pMYB80])' &= \alpha_{pY}[mMYB80] - \mu_{pY}[pMYB80], \\
([pMS1])' &= \alpha_{pM}[mMS1] - \mu_{pM}[pMS1], \\
([AMS:bHLH])' &= \alpha_{AB}[pAMS][pbHLH] - \mu_{AB}[AMS:bHLH], \\
([DYT1:bHLH])' &= \alpha_{DB}[pDYT1][pbHLH] - \mu_{DB}[DYT1:bHLH].
\end{aligned}$$

This model fits well to the experimental data, including the second peak of the AMS protein, with the best fit having an objective function value of  $f = 0.8129$ . The parameters are given in Table I and the model dynamics are shown in Figure III, showing how the predicted AMS protein now exhibits two peaks.

Looking at the best fit from this model, the DYT1-bHLH complex associates faster than the AMS-bHLH complex, delaying the main production of MYB80 and MS1 until after the DYT1 levels begin to drop. Once MS1 levels rise, the levels of AMS protein are quickly down-regulated. This decreased level of AMS protein reduces MS1 protein, causing a short-lived spike in AMS protein levels before the negative feedback of TDF1 along with the lack of DYT1 causes all elements in the model to decay to zero at the end of the timecourse.

As shown in II, the Akaike Information Criterion with correction for finite sample size (AICc), shows that Model III is a better fit than the other two models, even though it includes more parameters.

To evaluate the robustness of this fit, we used the HYPERSPACE algorithm (Zamora-Sillero et al., 2011) to assess the global parameter sensitivity. This algorithm uses an out-of-equilibrium adaptive Metropolis Monte Carlo method to identify regions of parameter space that satisfy a prescribed criteria. Here, we set the algorithm to search for parameter combinations which correspond to predicted dynamics with an objective function value within 10% of the best value, i.e. with  $f^* < 0.8942$ . In this case, the algorithm produces 17,742

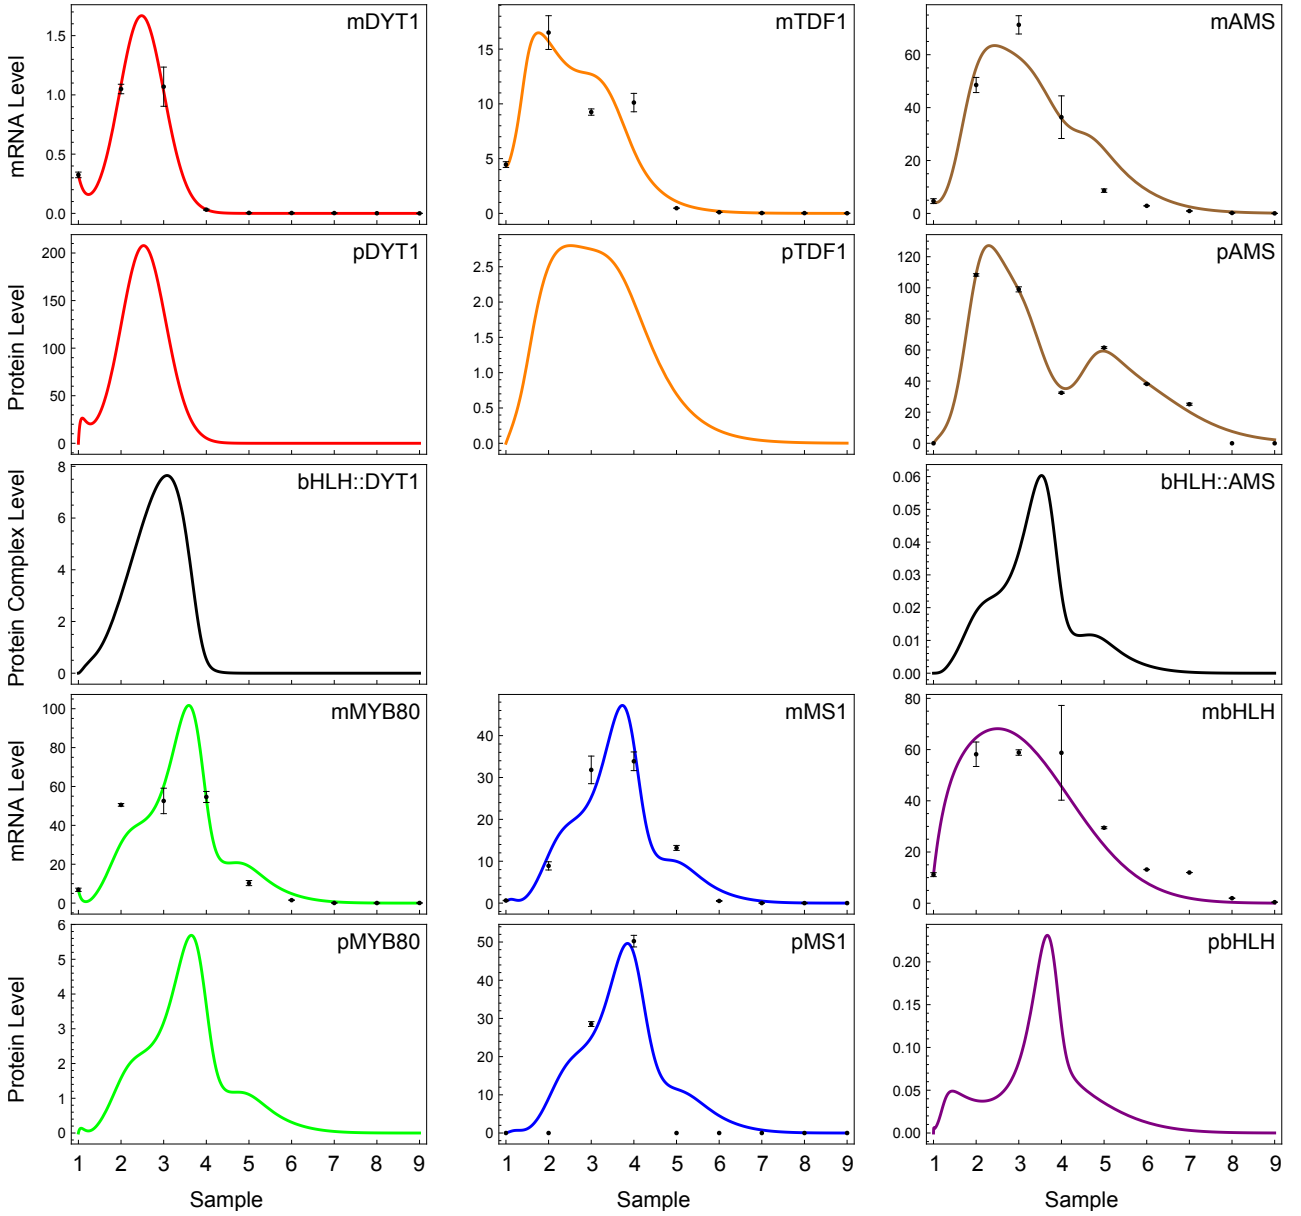

Figure III: Predicted (lines) and measured (dots with standard error bars) protein and mRNA levels for Model III, using the model parameter values given in Table I.

parameter sets, and Figure IV shows boxplots of the parameter ranges within these sets. The majority of the parameter values can be considered to be fairly well constrained by the experimental data, with the exception of three negative feedback parameters,  $\zeta_{TA}$ ,  $\zeta_{MM}$ ,  $\zeta_{AM}$ . These three parameters vary over a large range but are small in all the parameter sets, suggesting that these negative feedback loops (AMS inhibiting TDF1 transcription, MS1 inhibiting AMS transcription and MS1 inhibiting its own transcription) are not required for the model.

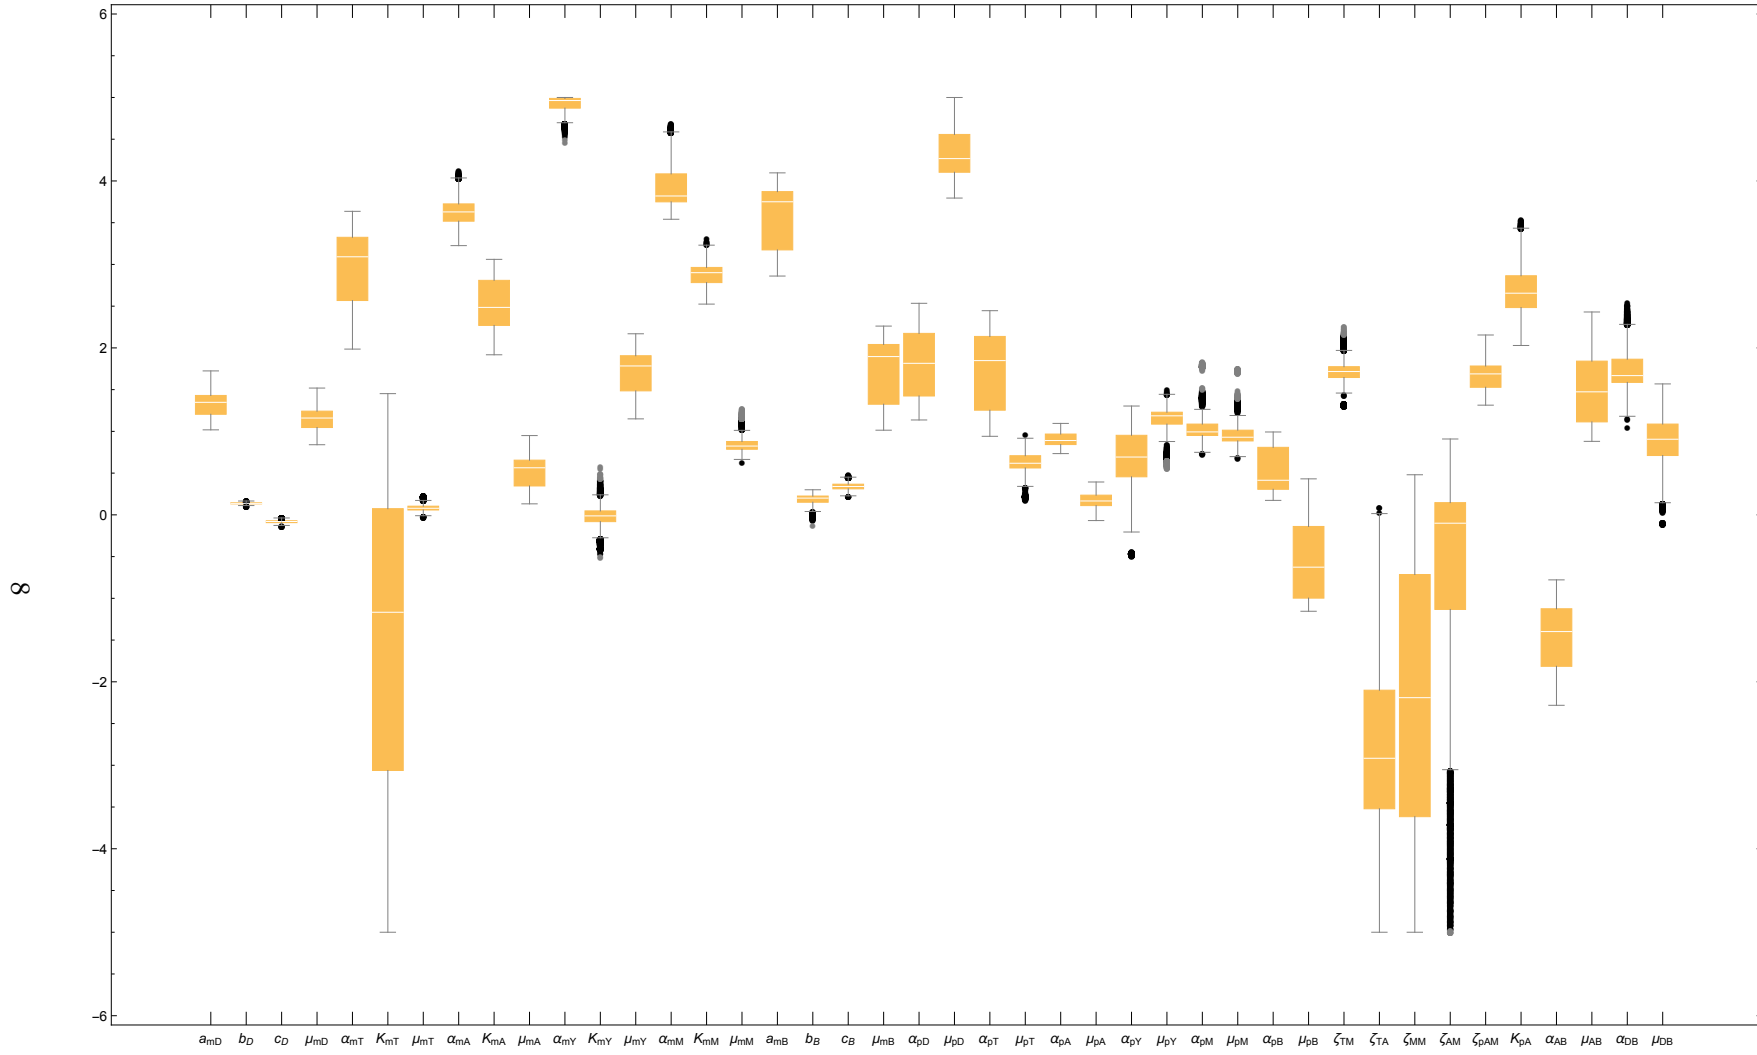

Figure IV: Set of boxplots from running the HYPERSPACE algorithm, showing the variability of the 42 parameters in Model III, for parameter combinations that achieve a similarly good fit as the set of values in Table I.

## 4 Model IV

Our fourth model is therefore one given by removing these three negative feedback loops (AMS inhibiting TDF1 transcription, MS1 inhibiting AMS transcription and MS1 inhibiting its own transcription), this does not significantly affect the predicted dynamics. Thus, our minimal model that captures the observed dynamics is given by:

$$\begin{aligned}
([mDYT1])' &= \alpha_{mD}(t) - \mu_{mD}[mDYT1], \\
([mbHLH])' &= \alpha_{mB}(t) - \mu_{mB}[mbHLH], \\
([mTDF1])' &= \alpha_{mT} \frac{[DYT1:bHLH]}{K_T + [DYT1:bHLH] + [pMS1]\zeta_{TM}} - \mu_{mT}[mTDF1], \\
([mAMS])' &= \alpha_{mA} \frac{[pTDF1]}{K_A + [pTDF1]} - \mu_A[mAMS], \\
([mMYB80])' &= \alpha_{mY} \frac{[AMS:bHLH]}{K_Y + [AMS:bHLH]} - \mu_Y[mMYB80], \\
([mMS1])' &= \alpha_{mM} \frac{[pMYB80]}{K_M + [pMYB80]} - \mu_M[mMS1], \\
([pDYT1])' &= \alpha_{pD}[mDYT1] - \mu_{pD}[pDYT1] - \alpha_{DB}[pDYT1][pbHLH] + \mu_{DB}[DYT1:bHLH], \\
([pbHLH])' &= \alpha_{pB}[mbHLH] - \mu_{pB}[pbHLH] - \alpha_{AB}[pAMS][pbHLH] + \mu_{AB}[AMS:bHLH] \\
&\quad - \alpha_{DB}[pDYT1][pbHLH] + \mu_{DB}[DYT1:bHLH], \\
([pTDF1])' &= \alpha_{pT}[mTDF1] - \mu_{pT}[pTDF1], \\
([pAMS])' &= \alpha_{pA}[mAMS] - \mu_{pA}[pAMS] \left( 1 + \frac{\zeta_{pA}[pMS1]}{K_{pA} + [pMS1]} \right) \\
&\quad - \alpha_{AB}[pbHLH][pAMS] + \mu_{AB}[AMS:bHLH], \\
([pMYB80])' &= \alpha_{pY}[mMYB80] - \mu_{pY}[pMYB80], \\
([pMS1])' &= \alpha_{pM}[mMS1] - \mu_{pM}[pMS1], \\
([AMS:bHLH])' &= \alpha_{AB}[pAMS][pbHLH] - \mu_{AB}[AMS:bHLH], \\
([DYT1:bHLH])' &= \alpha_{DB}[pDYT1][pbHLH] - \mu_{DB}[DYT1:bHLH].
\end{aligned}$$

This model has a marginal decrease in  $f^*$  and a smaller corrected Akaike Information Criterion (AICc, see Table II), as it has three fewer parameters, and so we give this as a preferred model to Model III. This model still has MS1 negatively regulating TDF1, as well as enhancing AMS protein degradation; the inclusion of these two feedbacks were essential to fit to the experimental data.

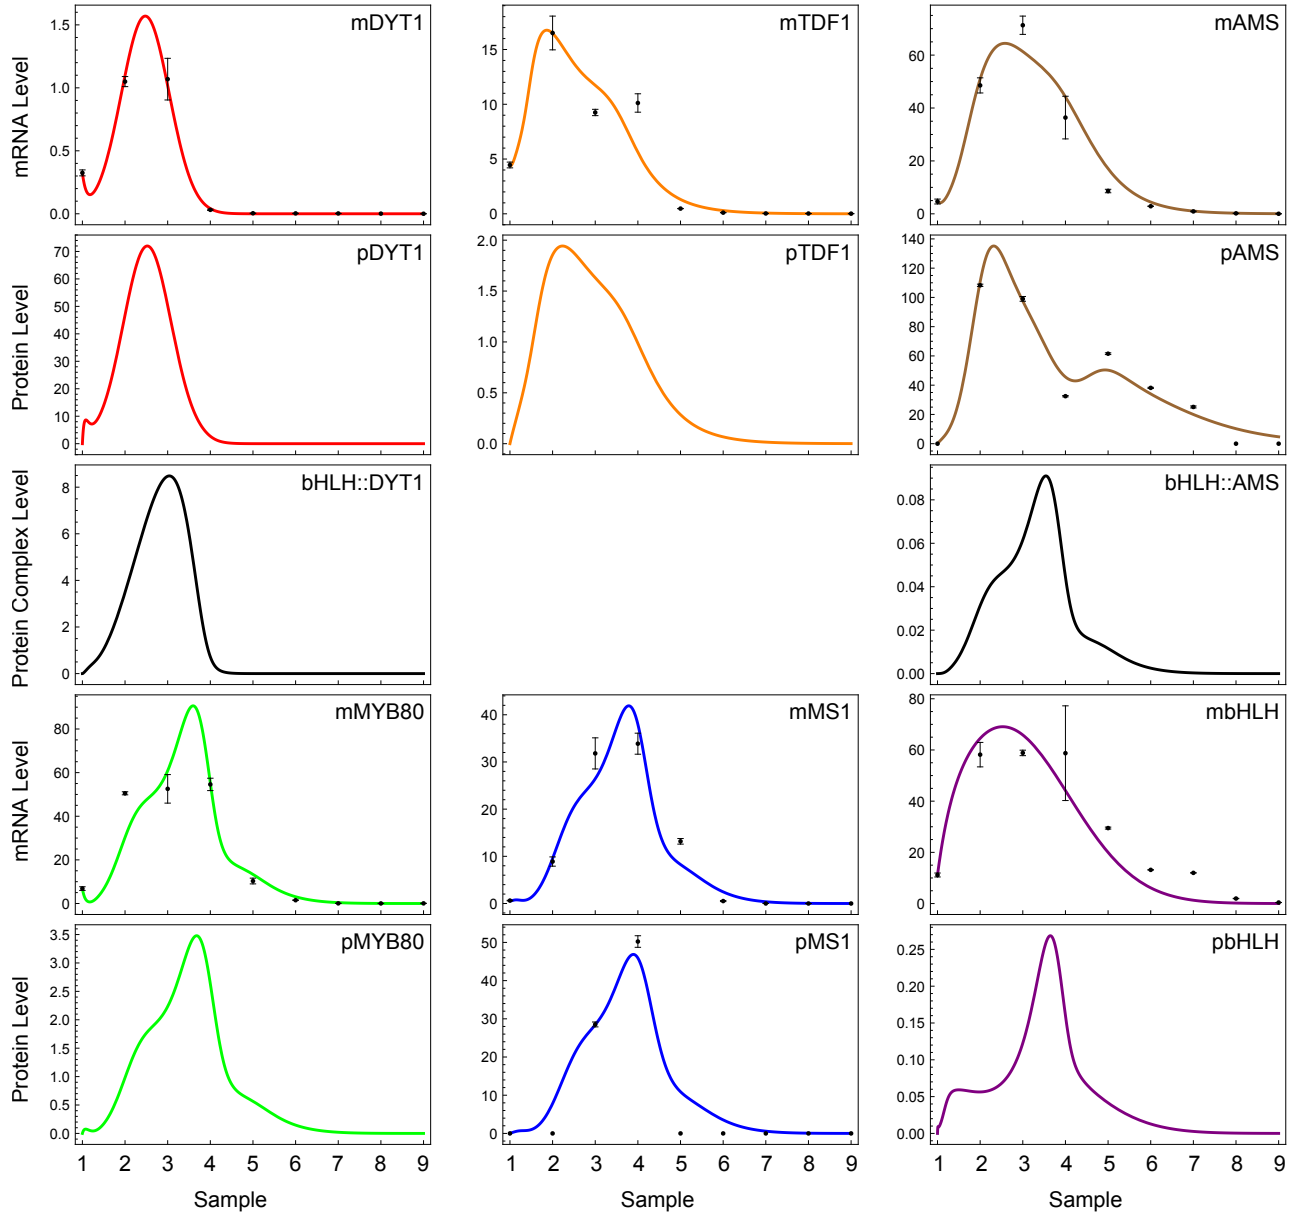

Figure V: Predicted (lines) and measured (dots with standard error bars) protein and mRNA levels for Model IV, using the model parameter values given in Table I.

## 5 Model V

Using the fourth model, we then added two additional potential negative feedbacks of AMS and/or MS1 inhibiting DYT1, although we are aware that the use of an exponential function for the promotion of DYT1 may mask the effect of these feedbacks.

We also note that due to the lack of data on the protein levels except AMS and MS1, these levels are entirely arbitrary, and hence we now set  $\alpha_{pT} = \alpha_{pY} = \alpha_{pD} = 1$ , reducing the number of parameters in the model. We also swapped to using the principal axis method (Brent, 2002) implemented in Mathematica for minimization of the objective function, this seems to optimize the fit better than the genetic algorithm in Matlab. The equations describing this model are therefore given by:

$$\begin{aligned}
([mDYT1])' &= \alpha_{mD}(t) \frac{1}{1 + \zeta_{DA}[pAMS] + \zeta_{DM}[pMS1]} - \mu_{mD}[mDYT1], \\
([mbHLH])' &= \alpha_{mB}(t) - \mu_{mB}[mbHLH], \\
([mTDF1])' &= \alpha_{mT} \frac{[DYT1:bHLH]}{K_T + [DYT1:bHLH] + [pMS1]\zeta_{TM}} - \mu_{mT}[mTDF1], \\
([mAMS])' &= \alpha_{mA} \frac{[pTDF1]}{K_A + [pTDF1]} - \mu_A[mAMS], \\
([mMYB80])' &= \alpha_{mY} \frac{[AMS:bHLH]}{K_Y + [AMS:bHLH]} - \mu_Y[mMYB80], \\
([mMS1])' &= \alpha_{mM} \frac{[pMYB80]}{K_M + [pMYB80]} - \mu_M[mMS1], \\
([pDYT1])' &= \alpha_{pD}[mDYT1] - \mu_{pD}[pDYT1] - \alpha_{DB}[pDYT1][pbHLH] + \mu_{DB}[DYT1:bHLH], \\
([pbHLH])' &= \alpha_{pB}[mbHLH] - \mu_{pB}[pbHLH] - \alpha_{AB}[pAMS][pbHLH] + \mu_{AB}[AMS:bHLH] \\
&\quad - \alpha_{DB}[pDYT1][pbHLH] + \mu_{DB}[DYT1:bHLH], \\
([pTDF1])' &= \alpha_{pT}[mTDF1] - \mu_{pT}[pTDF1], \\
([pAMS])' &= \alpha_{pA}[mAMS] - \mu_{pA}[pAMS] \left( 1 + \frac{\zeta_{pA}[pMS1]}{K_{pA} + [pMS1]} \right) \\
&\quad - \alpha_{AB}[pbHLH][pAMS] + \mu_{AB}[AMS:bHLH], \\
([pMYB80])' &= \alpha_{pY}[mMYB80] - \mu_{pY}[pMYB80], \\
([pMS1])' &= \alpha_{pM}[mMS1] - \mu_{pM}[pMS1], \\
([AMS:bHLH])' &= \alpha_{AB}[pAMS][pbHLH] - \mu_{AB}[AMS:bHLH], \\
([DYT1:bHLH])' &= \alpha_{DB}[pDYT1][pbHLH] - \mu_{DB}[DYT1:bHLH].
\end{aligned}$$

The final result, as shown in Figure VI, does includes the negative feedback of DYT1 by AMS, but not by MS1 (and we therefore set  $\zeta_{DM} = 0$ ). This model was also tested for the inclusion of the three negative feedbacks removed in model IV, this did not change the conclusion that these should be removed.

Using the HYPERSPACE algorithm again, as shown in Figure VII, gives 9, 168 parameters sets within 10% of the best  $f^*$  value found. This shows that the majority of the parameters are well-constrained around the values in Table I, except for the constant  $b_B$  from the exponential function which drives bHLH expression, which is essentially zero and could be removed from the model.

Our final model therefore includes AMS inhibiting DYT1 and MS1 inhibiting TDF1, as well as MS1 increasing the degradation rate of AMS protein.

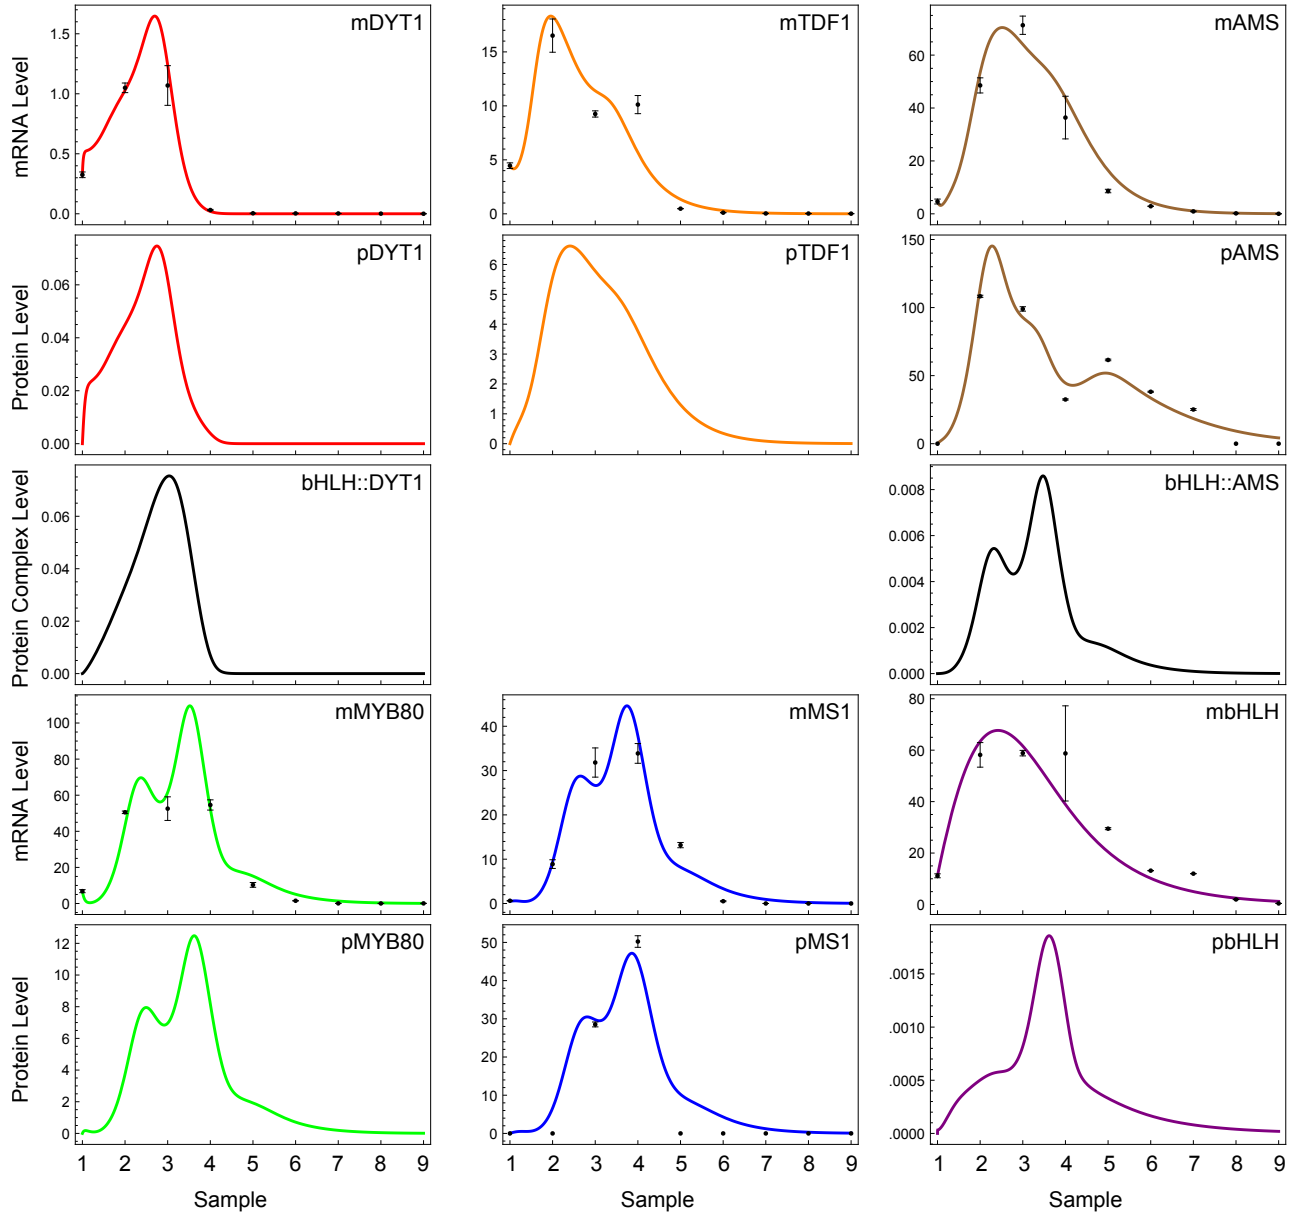

Figure VI: Predicted (lines) and measured (dots with standard error bars) protein and mRNA levels for Model V, using the model parameter values given in Table I.

|               | Model I  | Model II | Model III | Model IV | Model V |
|---------------|----------|----------|-----------|----------|---------|
| $a_{mD}$      | 1.341    | 1.0729   | 1.0336    | 1.2182   | 3.5685  |
| $b_D$         | 0.16005  | 0.1414   | 0.1251    | 0.1403   | 0.1616  |
| $c_D$         | -0.02336 | -0.0431  | -0.1491   | -0.1054  | -0.2089 |
| $\mu_{mD}$    | 1.1962   | 0.9141   | 0.7922    | 1.0162   | 1.0635  |
| $\alpha_{mT}$ | 3.7589   | 3.0332   | 2.5664    | 2.4742   | 3.4919  |
| $K_{mT}$      | 1.284    | 0.7030   | -0.2194   | -0.6609  | -0.1856 |
| $\mu_{mT}$    | 0.8930   | 0.8548   | 0.2291    | 0.1706   | 0.1665  |
| $\alpha_{mA}$ | 4.5304   | 2.9137   | 3.6552    | 3.2129   | 4.2118  |
| $K_{mA}$      | 1.6435   | 0.9106   | 1.5624    | 1.0322   | 3.9653  |
| $\mu_{mA}$    | 0.4261   | 0.42347  | 0.5200    | 0.5673   | 1.0174  |
| $\alpha_{mY}$ | 4.9516   | 3.0006   | 4.4816    | 4.2121   | 5.3342  |
| $K_{mY}$      | 4.5781   | 1.7227   | 0.0114    | -0.0556  | -0.0964 |
| $\mu_{mY}$    | 0.6575   | 0.5306   | 1.2145    | 1.2237   | 1.317   |
| $\alpha_{mM}$ | 4.9368   | 4.6266   | 4.2151    | 3.6899   | 3.9932  |
| $K_{mM}$      | 3.1689   | 3.009    | 2.2539    | 1.6915   | 2.5715  |
| $\mu_{mM}$    | 0.5020   | 0.5484   | 1.0177    | 0.8769   | 0.834   |
| $a_{mB}$      | n/a      | 3.2008   | 2.3934    | 2.3317   | 1.9571  |
| $b_B$         | n/a      | 0.2544   | 0.0814    | 0.0702   | -1.5331 |
| $c_B$         | n/a      | 0.2762   | 0.3731    | 0.3406   | 0.2405  |
| $\mu_{mB}$    | n/a      | 1.3529   | 0.5530    | 0.4811   | -0.1501 |
| $\alpha_{pD}$ | 0.4452   | 1.7872   | 3.4344    | 3.0000   | 0       |
| $\mu_{pD}$    | 0.2156   | -0.1724  | 1.3369    | 1.3355   | 1.3485  |
| $\alpha_{pT}$ | -0.8529  | 0.1092   | -0.40406  | -0.3645  | 0       |
| $\mu_{pT}$    | 0.7451   | 0.7175   | 0.2733    | 0.5308   | 0.3403  |
| $\alpha_{pA}$ | 0.9393   | 1.0249   | 0.94953   | 0.8907   | 0.903   |
| $\mu_{pA}$    | -0.1123  | 0.3939   | 0.2547    | -0.0442  | -0.0401 |
| $\alpha_{pY}$ | -1.0099  | -0.7430  | -0.0677   | -0.4009  | 0       |
| $\mu_{pY}$    | 0.50111  | 0.5494   | 1.1799    | 1.0074   | 0.9407  |
| $\alpha_{pM}$ | 0.65051  | 0.7288   | 0.8569    | 0.9379   | 0.9141  |
| $\mu_{pM}$    | 0.60883  | 0.6843   | 0.8176    | 0.879    | 0.8751  |
| $\alpha_{pB}$ | n/a      | 0.7744   | -0.8847   | -0.7863  | -2.7403 |
| $\mu_{pB}$    | n/a      | 3.4935   | 1.9287    | 1.9039   | 1.9577  |
| $\zeta_{TM}$  | 0.56579  | 0.5649   | 0.7117    | 0.7762   | -0.2696 |
| $\zeta_{TA}$  | -3.071   | -2.6597  | -1.8183   | n/a      | n/a     |
| $\zeta_{MM}$  | -2.4872  | -2.0236  | -1.6413   | n/a      | n/a     |
| $\zeta_{AM}$  | 0.0956   | -0.5933  | 0.0607    | n/a      | n/a     |
| $\zeta_{pAM}$ | 1.4913   | 3.095    | 3.0258    | 2.681    | 3.7257  |
| $K_{pA}$      | 1.1946   | 1.9352   | 1.996     | 1.9582   | 3.7647  |
| $\alpha_{AB}$ | n/a      | n/a      | -0.88059  | -0.8797  | 1.1176  |

|               |     |     |        |        |        |
|---------------|-----|-----|--------|--------|--------|
| $\mu_{AB}$    | n/a | n/a | 1.4447 | 1.3934 | 2.2964 |
| $\alpha_{DB}$ | n/a | n/a | 1.5156 | 1.7552 | 5.8060 |
| $\mu_{DB}$    | n/a | n/a | 1.6964 | 1.6173 | 2.6633 |
| $\zeta_{DA}$  | n/a | n/a | n/a    | n/a    | 0.1480 |

Table I: Best-fit  $\log_{10}$  values of the parameters in the five different models; n/a denotes a parameter not included in that model.

|            | Model I  | Model II | Model III | Model IV | Model V  |
|------------|----------|----------|-----------|----------|----------|
| $f^*$      | 1.6734   | 1.3869   | 0.8129    | 0.7913   | 0.6994   |
| $n_{pars}$ | 32       | 38       | 42        | 39       | 37       |
| $n_{data}$ | 63       | 72       | 72        | 72       | 72       |
| AICc       | -322.763 | -402.924 | -497.555  | -474.102 | -512.690 |

Table II: Values of the objective function, number of parameters, number of datapoints and corrected Akaike Information Criterion (AICc) for the best fit found for the five models. Smaller values of  $f^*$  and  $AICc = 2 * n_{pars} * n_{data} / (n_{data} - n_{pars} - 1) + 2n_{data} \ln(f^*/n_{data})$  represent a better fit to the data.

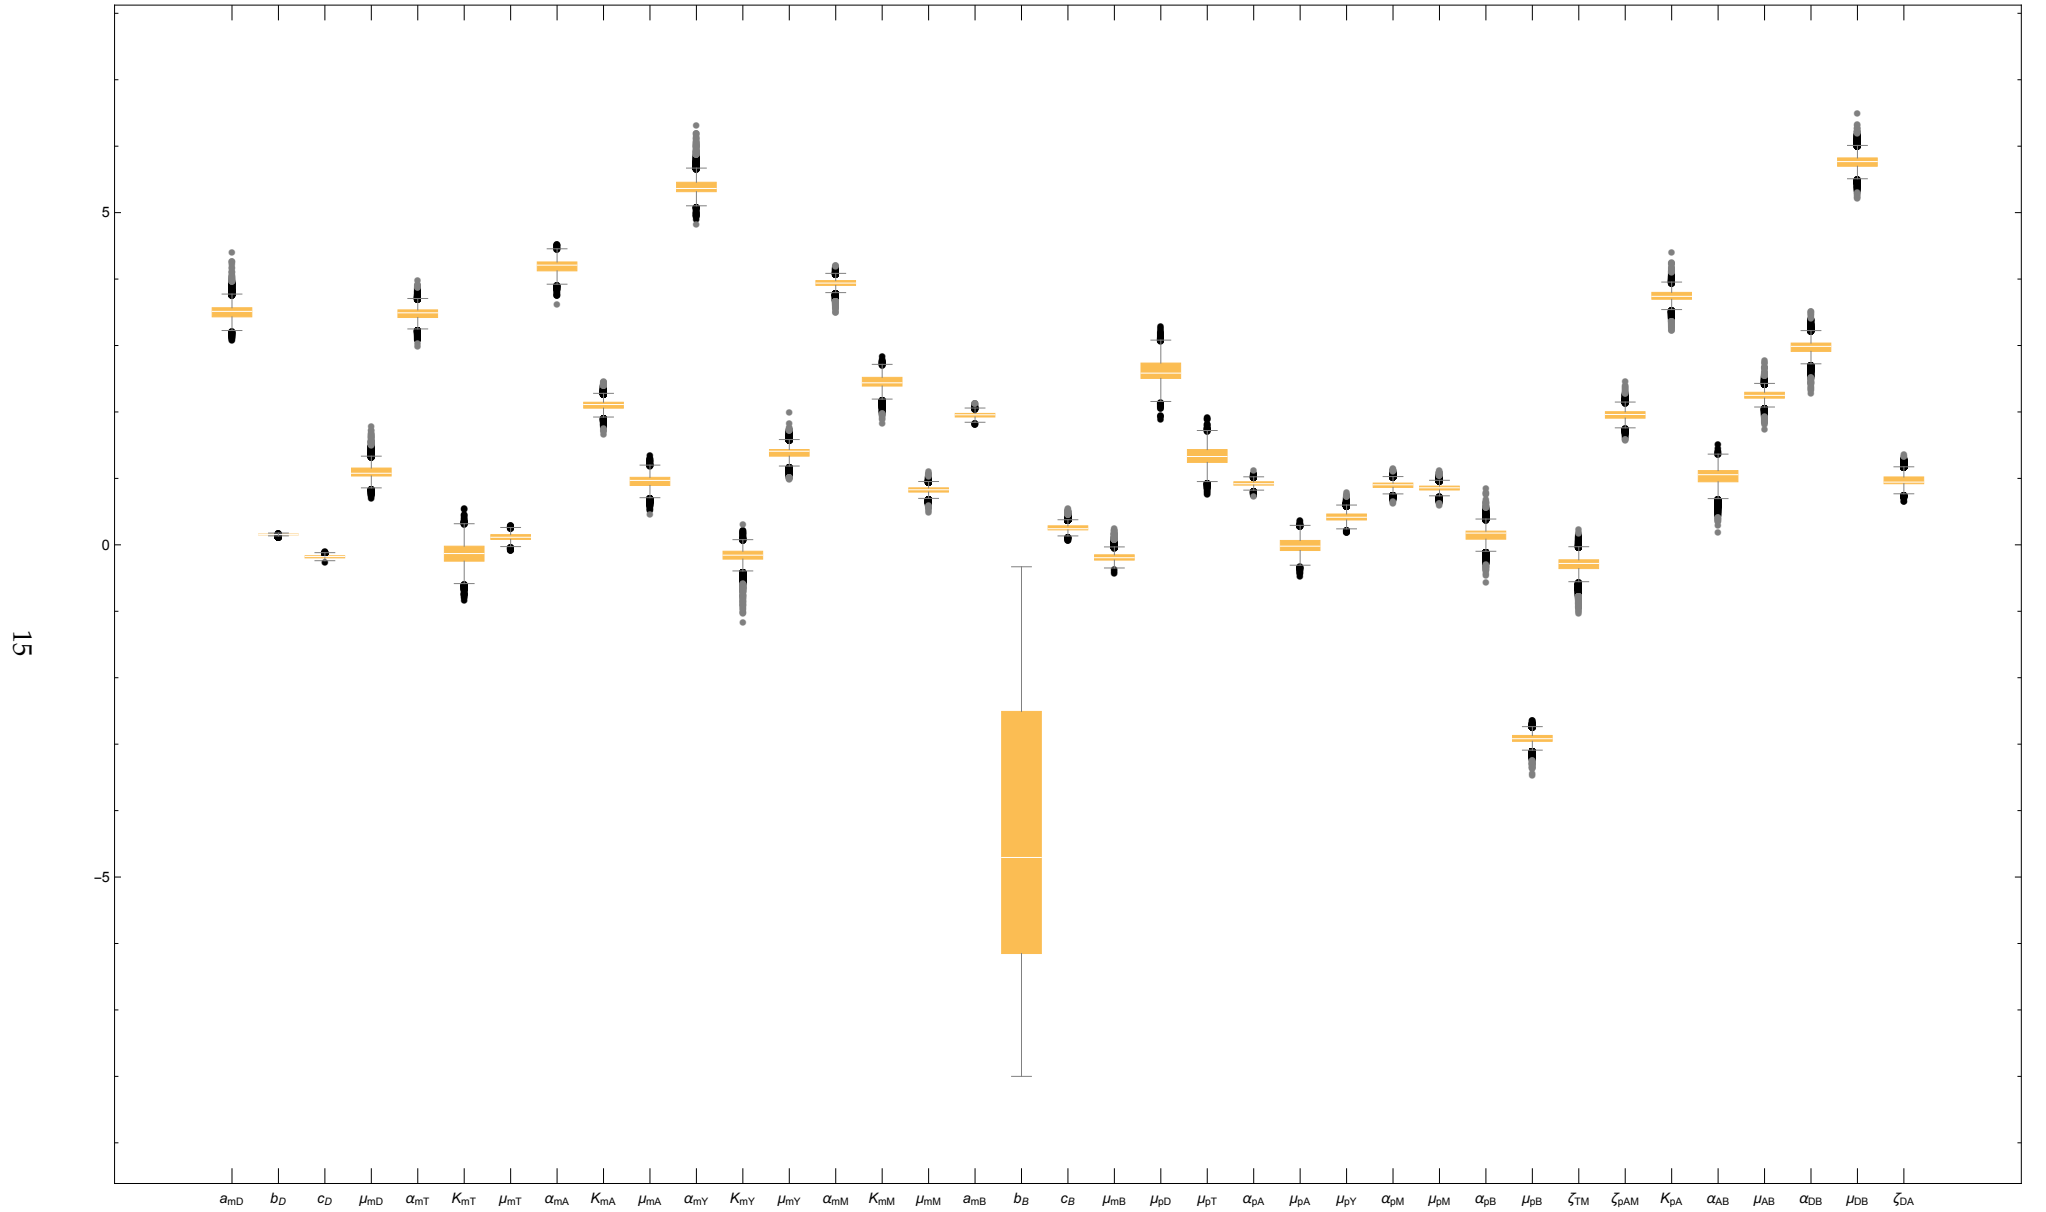

Figure VII: Set of boxplots from running the HYPERSPACE algorithm, showing the variability of the 37 parameters in Model V, for parameter combinations that achieve a similarly good fit as the set of values in Table I

## 6 Simulation of Mutant Phenotypes

We now simulate the effect of different mutants from Model V. First, we consider the *ms1* mutant in Figure VIII, where we block the production of MS1 protein and mRNA, as well as setting the initial mRNA level to be zero. In this simulation, the lack of MS1 causes an up-regulation of TDF1 and AMS, as is seen in the mutant data (Figure S4), and the AMS protein is tied to the AMS mRNA levels.

The *ams* mutant is shown in Figure IX, where we block the production of AMS protein and mRNA,  $\alpha_{mA} = \alpha_{pA} = 0$ , and set the initial mRNA level of AMS to be zero. This has the effect of an increase of TDF1, as the downstream genes (MYB80 and MS1) are not present to cause TDF1's downregulation via MS1.

We also show in Figure X the effect of removing the enhanced AMS protein degradation by MS1,  $\zeta_{pAM} = 0$ , it can be seen that the AMS protein levels then remain coupled to the AMS mRNA levels, as would be expected.

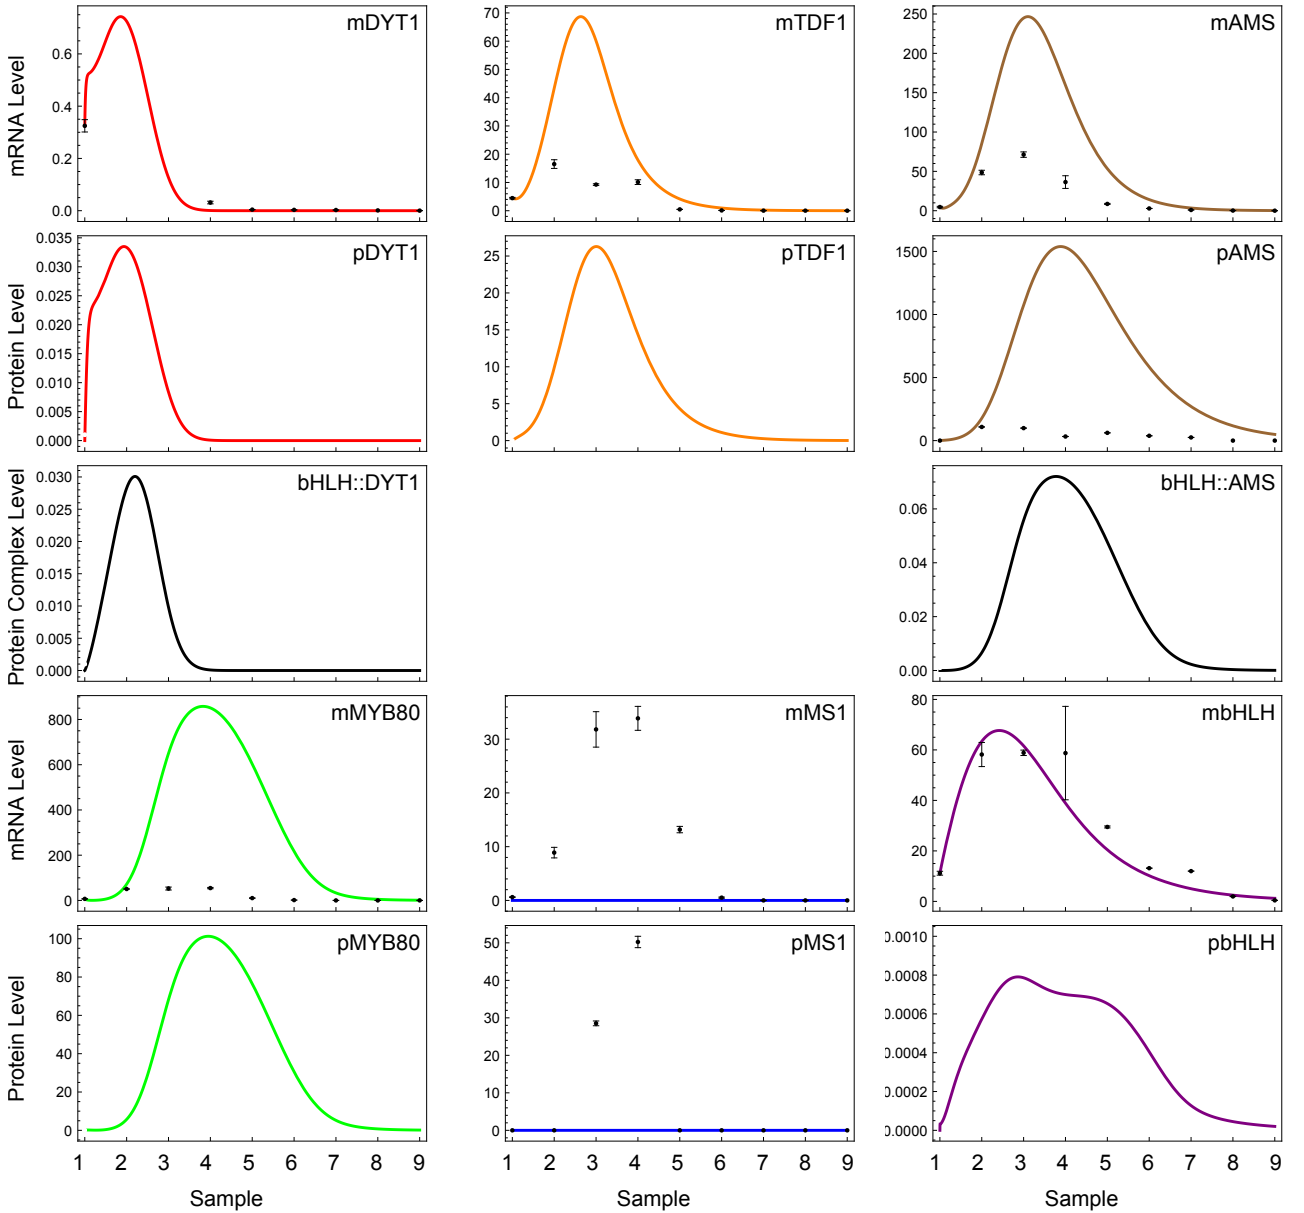

Figure VIII: Predicted (lines) and measured (dots with standard error bars) protein and mRNA levels for the *ms1* mutant,  $\alpha_{mM} = \alpha_{pM} = 0$ , using the model parameter values given for Model V in Table I.

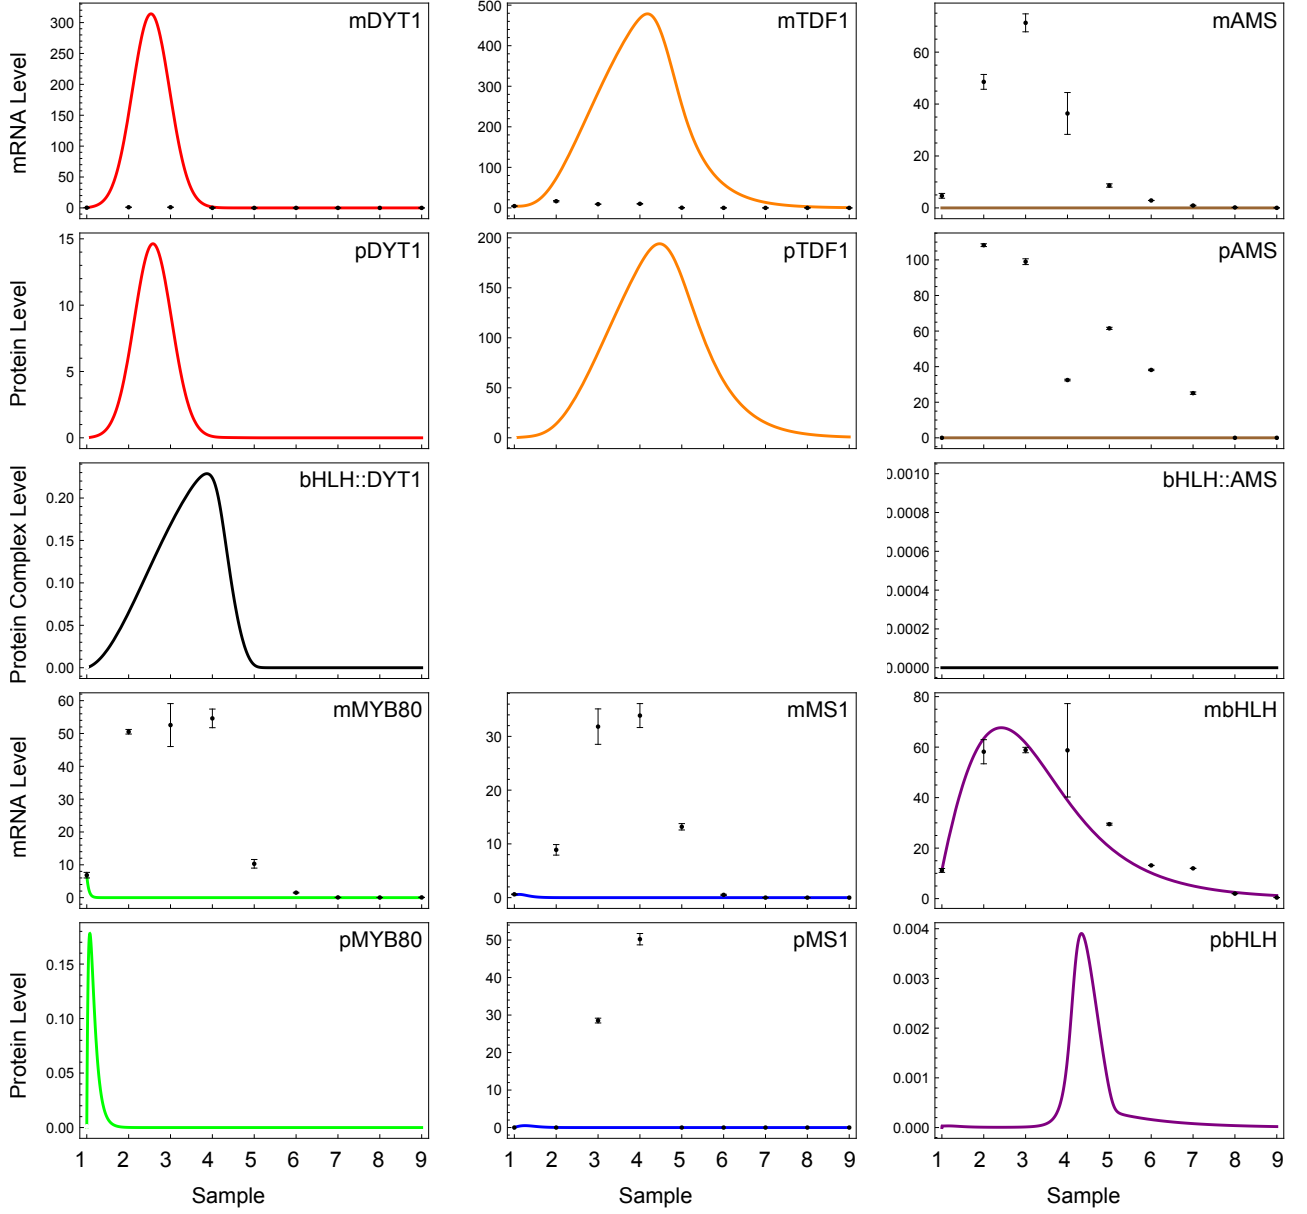

Figure IX: Predicted (lines) and measured (dots with standard error bars) protein and mRNA levels for the *ams* mutant,  $\alpha_{mA} = \alpha_{pA} = 0$ , other parameter values as given for Model V in Table I.

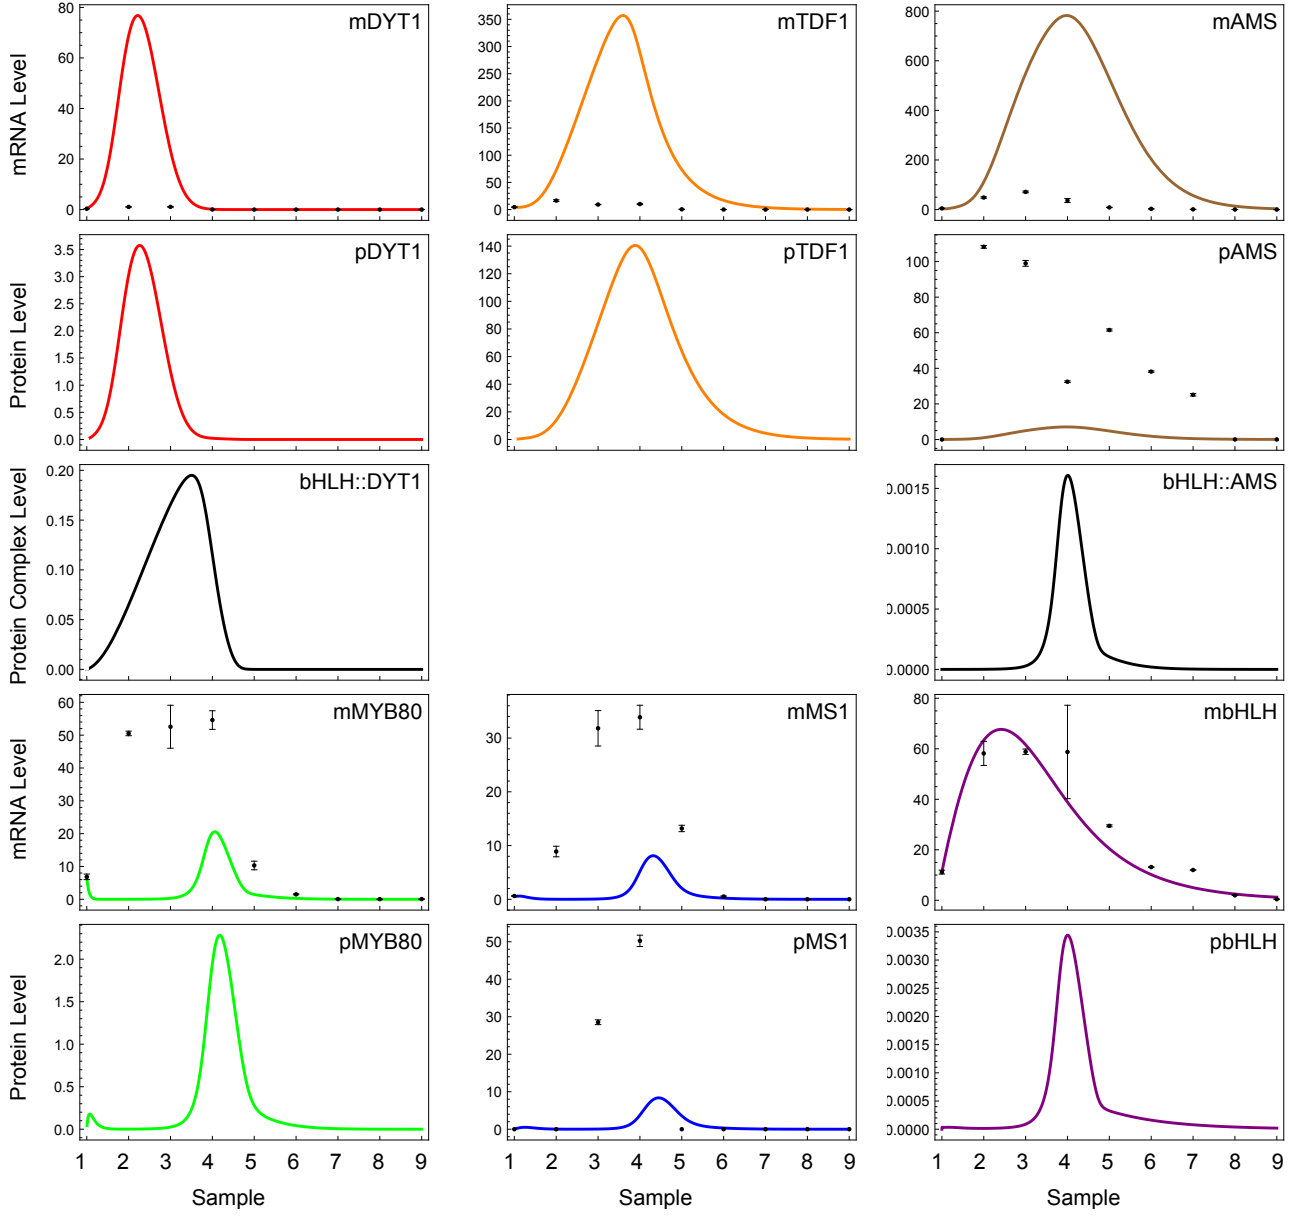

Figure X: Predicted (lines) and measured (dots with standard error bars) protein and mRNA levels for the removal of MS1 enhancing AMS protein degradation in Model V,  $\zeta_{pAM} = 0$ , other parameter values as given in Table I.

## References

- Brent, R. P. (2002). *Algorithms for minimization without derivatives*. New York: Dover Publications.
- Feng, B., D. Lu, X. Ma, Y. Peng, Y. Sun, G. Ning, and H. Ma (2012). Regulation of the arabidopsis anther transcriptome by *dyt1* for pollen development. *The Plant Journal* 72(4), 612–624.
- Xu, J., C. Yang, Z. Yuan, D. Zhang, M. Y. Gondwe, Z. Ding, W. Liang, D. Zhang, and Z. A. Wilson (2010). The aborted microspores regulatory network is required for postmeiotic male reproductive development in *arabidopsis thaliana*. *The Plant Cell* 22(1), 91–107.
- Zamora-Sillero, E., M. Hafner, A. Ibig, J. Stelling, and A. Wagner (2011). Efficient characterization of high-dimensional parameter spaces for systems biology. *BMC Systems Biology* 5(1), 142.
